# Supplementary material
Source: MDPI journal article supplement (https://www.mdpi.com/2504-3900/87/1/35)
Supplement: s1 [file s1]

**Table S1** The detailed results of porosity and permeability in well AM1, in addition to core numbers and depth of each measurement sample.

| Sample. No | Core. No | Depth (m) | Nature                    | porosity % | Permeability air (md) | Slip corrected: Air Permeability(md) |
|------------|----------|-----------|---------------------------|------------|-----------------------|--------------------------------------|
| 60H        | C=4      | 2890.13   | L . S . Grey .Col .vug    | 23.3       | 122                   | 109                                  |
| 60V        | C=4      | 2890.13   | L . S . Grey .Col .vug    | 20.3       | 61                    | 53                                   |
| 61H        | C=4      | 2890.76   | L . S . Grey .Col .vug    | 24.7       | 440                   | 410                                  |
| 61V        | C=4      | 2890.76   | L . S . Grey .Col .vug    | 18.6       | 91                    | 80                                   |
| 62H        | C=4      | 2891.34   | L . S . Grey .Col .       | 25.3       | 269                   | 243                                  |
| 62V        | C=4      | 2891.34   | L . S . Grey .Col .vug    | 26.9       | 165                   | 143                                  |
| 63H        | C=4      | 2891.81   | L . S . Grey .Col .       | 24.5       | 137                   | 123                                  |
| 63V        | C=4      | 2891.81   | L . S . Grey .Col .       | 23.6       | 64                    | 55                                   |
| 64H        | C=4      | 2892.36   | L . S . Grey .Col .       | 12.6       | 5.3                   | 4.4                                  |
| 64V        | C=4      | 2892.36   | L . S . Grey .Col .Fra    | 13         | 4.9                   | 3.7                                  |
| 65H        | C=4      | 2892.82   | L . S . Grey .Col .vug    | 22.9       | 93                    | 83                                   |
| 65V        | C=4      | 2892.82   | L . S . Grey .Col .       | 23.6       | 143                   | 128                                  |
| 66H        | C=4      | 2893.21   | L . S . Grey .Col .       | 6.2        | 0.77                  | 0.04                                 |
| 66V        | C=4      | 2893.21   | L . S . Grey .Col .       | 5.5        | 0.036                 | 0.02                                 |
| 67H        | C=4      | 2893.87   | L . S . Grey .Col .vug    | 22.2       | 392                   | 362                                  |
| 67V        | C=4      | 2893.87   | L . S . Grey .Col .vug    | 26.8       | 621                   | 591                                  |
| 68H        | C=4      | 2894.31   | L . S . Grey .Col .vug    | 13.8       | 3.2                   | 2.3                                  |
| 69H        | C=4      | 2894.76   | L . S . Grey .Col .       | 13.5       | 1.7                   | 1.2                                  |
| 69V        | C=4      | 2894.76   | L . S . Grey .Col .       | 12.9       | 1.2                   | 0.83                                 |
| 70H        | C=4      | 2895.33   | L . S . Grey .Col .       | 11.7       | 0                     | 0                                    |
| 70V        | C=4      | 2895.33   | L . S . Grey .Col .       | 9.5        | 1.4                   | 1                                    |
| 71H        | C=4      | 2895.73   | L . S . Grey .Col .       | 13.3       | 0                     | 0                                    |
| 71V        | C=4      | 2895.73   | L . S . Grey .Col .       | 9.9        | 0.39                  | 0.25                                 |
| 72H        | C=5      | 2904.33   | L . S .Grey .Col .Vug     | 18         | 20                    | 16                                   |
| 72V        | C=5      | 2904.33   | L . S .Grey .Col .Vug     | 13.1       | 6.4                   | 4.8                                  |
| 73H        | C=5      | 2905.83   | L . S .Grey .Col .Fra.vug | 15.5       | 44                    | 37                                   |
| 73V        | C=5      | 2905.83   | L . S .Grey .Col .Fra.vug | 14.5       | 0                     | 0                                    |
| 74H        | C=5      | 2905.22   | L . S . Grey .vug .       | 14.3       | 8.9                   | 6.9                                  |
| 74V        | C=5      | 2905.22   | L . S . Grey .vug .       | 16.1       | 32                    | 27                                   |
| 75H        | C=5      | 2909.86   | L . S . Grey .vug .       | 17         | 8.8                   | 6.8                                  |
| 75V        | C=5      | 2909.86   | L . S . Grey .vug .       | 15.3       | 47                    | 40                                   |
| 76H        | C=5      | 2910.77   | L . S . Grey .vug .       | 13.6       | 1.5                   | 1                                    |
| 76V        | C=5      | 2910.77   | L . S . Grey .vug .       | 19.6       | 10.4                  | 8.1                                  |
| 77V        | C=6      | 2920.66   | L . S . Grey .Col .Comp   | 5.1        | 0.23                  | 0.14                                 |
| 78H        | C=6      | 2921.17   | L . S . Grey .Col .       | 9.3        | 11.8                  | 9.3                                  |
| 78V        | C=6      | 2921.17   | L . S . Grey .Col .       | 10.7       | 1.7                   | 1.2                                  |
| 79H        | C=6      | 2921.74   | L . S . Grey .Col .Fra    | 7.6        | 1.8                   | 1.3                                  |
| 79V        | C=6      | 2921.74   | L . S . Grey .Col .Fra    | 8          | 1.5                   | 1                                    |
| 80H        | C=6      | 2922.28   | L . S . Grey .Col .Comp   | 5.6        | 0.02                  | 1.01                                 |
| 81H        | C=6      | 2922.8    | L . S . Grey .Col .Fra    | 5.3        | 0.36                  | 0.23                                 |
| 81V        | C=6      | 2922.8    | L . S . Grey .Col .vug    | 6.9        | 0.94                  | 0.64                                 |

|      |     |         |                               |      |       |      |
|------|-----|---------|-------------------------------|------|-------|------|
| 82H  | C=6 | 2923.2  | L . S . Grey .Col .           | 5.5  | 1.1   | 0.75 |
| 83H  | C=6 | 2923.74 | L . S . Grey .Col .           | 8    | 1.7   | 1.2  |
| 83V  | C=6 | 2923.74 | L . S . Grey .Col .           | 9.9  | 3.3   | 2.4  |
| 84H  | C=6 | 2924.12 | L . S . Grey .Col .vug        | 10.5 | 1.04  | 0.71 |
| 84V  | C=6 | 2924.12 | L . S . Grey .Col .vug        | 11.8 | 5.1   | 3.8  |
| 85H  | C=6 | 2924.75 | L . S . Grey .Col .vug        | 13.9 | 7.1   | 5.4  |
| 85V  | C=6 | 2924.75 | L . S . Grey .Col .vug        | 11.2 | 23    | 19   |
| 86H  | C=6 | 2925.15 | L . S . Grey .Col .vug        | 3.3  | 1.4   | 1    |
| 87H  | C=6 | 2925.22 | L . S . Darek Grey .Col .Comp | 6.1  | 4     | 2.9  |
| 87V  | C=6 | 2925.22 | L . S . Darek Grey .Col .Comp | 4.6  | 0.05  | 0.03 |
| 88V  | C=6 | 2926.32 | L . S . Darek Grey .Col .Comp | 5.1  | 0.5   | 0.32 |
| 89H  | C=6 | 2926.9  | L . S . Darek Grey .Col .Comp | 6.5  | 2.9   | 2.1  |
| 90H  | C=7 | 2929.3  | L . S . Darek Grey .Col .Comp | 4.7  | 0.013 | 0.01 |
| 90V  | C=7 | 2929.3  | L . S . Darek Grey .Col .Comp | 6.1  | 0.012 | 0.01 |
| 91H  | C=7 | 2929.74 | L . S . Grey .Col .Broken     | 14.8 | 0     | 0    |
| 91V  | C=7 | 2929.74 | L . S . Grey .Col .           | 19.6 | 1.6   | 1.1  |
| 92H  | C=7 | 2930.28 | L . S . Grey .Col .           | 11.6 | 0.35  | 0.22 |
| 92V  | C=7 | 2930.28 | L . S . Grey .Col .           | 7.3  | 0.33  | 0.25 |
| 93H  | C=7 | 2930.77 | L . S . Grey .Col .Fra        | 5.6  | 1.7   | 1.2  |
| 94H  | C=7 | 2931.12 | L . S . Grey .Col .Fra        | 9.1  | 0     | 0    |
| 95H  | C=7 | 2931.68 | L . S . Grey .Col .comp       | 4.4  | 0.045 | 0.02 |
| 96H  | C=7 | 2932.14 | L . S . Grey .Col .           | 12.5 | 1.6   | 1.1  |
| 96V  | C=7 | 2932.14 | L . S . Grey .Col .           | 7.3  | 0.97  | 0.66 |
| 97H  | C=7 | 2932.75 | L . S . Grey .Col .Fra        | 19.6 | 9.7   | 7.5  |
| 97V  | C=7 | 2932.75 | L . S . Grey .Col .Fra        | 23.1 | 12    | 10   |
| 98H  | C=7 | 2933.34 | L . S . Grey .Col .comp       | 4.2  | 0.012 | 0.01 |
| 98V  | C=7 | 2933.34 | L . S . Grey .Col .Fra        | 4.3  | 0.045 | 0.02 |
| 99H  | C=7 | 2933.65 | L . S . Grey .Col .           | 10.3 | 0.37  | 0.23 |
| 99V  | C=7 | 2933.65 | L . S . Grey .Col .           | 5.5  | 0.009 | 0    |
| 100H | C=7 | 2934.76 | L . S . Grey .Col .           | 5.3  | 0.045 | 0.02 |
| 100V | C=7 | 2934.76 | L . S . Grey .Col .Fra        | 5.6  | 0.28  | 0.17 |
| 101H | C=7 | 2935.13 | L . S . Grey .Col .           | 15.9 | 7.5   | 5.7  |
| 101V | C=7 | 2935.13 | L . S . Grey .Col .           | 17.3 | 2.5   | 1.8  |
| 102H | C=7 | 2935.8  | L . S . Grey .Col .           | 5.1  | 0.023 | 0.01 |
| 103H | C=7 | 2936.29 | L . S . Grey .Col .Fra        | 18.2 | 13    | 10   |
| 103V | C=7 | 2936.29 | L . S . Grey .Col .           | 16.7 | 0.76  | 0.51 |
| 104H | C=7 | 2936.88 | L . S . Grey .Col .           | 8.8  | 0.3   | 0.19 |
| 104V | C=7 | 2936.88 | L . S . Grey .Col .           | 9    | 0.37  | 0.23 |
| 105H | C=7 | 2937.36 | L . S . Grey .Col .           | 5.1  | 0.29  | 0.02 |
| 105V | C=7 | 2937.36 | L . S . Grey .Col .           | 1.8  | 0.018 | 0.01 |
| 106H | C=7 | 2937.77 | L . S . Grey .Col .           | 9.6  | 1.4   | 1    |
| 106V | C=7 | 2937.77 | L . S . Grey .Col .           | 12.2 | 8.8   | 6.8  |
| 107H | C=7 | 2938.35 | L . S . Grey .Col .           | 14.2 | 1.3   | 0.91 |
| 107V | C=7 | 2938.35 | L . S . Grey .Col .           | 12.3 | 0.39  | 0.25 |
| 108H | C=7 | 2938.81 | L . S . Grey .Col .           | 16.1 | 1.3   | 0.91 |
| 108V | C=7 | 2938.81 | L . S . Grey .Col .           | 14.9 | 0.84  | 0.56 |
| 109H | C=7 | 2939.36 | L . S . Grey .Col .Fra        | 6.1  | 0.205 | 0.13 |
| 109V | C=7 | 2939.36 | L . S . Grey .Col .           | 6.2  | 0.41  | 0.02 |

|      |     |         |                          |      |       |      |
|------|-----|---------|--------------------------|------|-------|------|
| 110H | C=7 | 2939.82 | L . S . Grey .Col .      | 15.7 | 0.55  | 0.36 |
| 110V | C=7 | 2939.82 | L . S . Grey .Col .      | 17.5 | 2.2   | 1.6  |
| 111H | C=7 | 2940.75 | L . S . Grey .Col .      | 2.8  | 0.003 | 0    |
| 112H | C=7 | 2941.31 | L . S . Grey .Col .      | 5.9  | 0.013 | 0.01 |
| 112V | C=7 | 2941.31 | L . S . Grey .Col .      | 7.3  | 0.003 | 0    |
| 113V | C=8 | 2945.23 | L . S . Grey .Col .      | 8.8  | 0.141 | 0.08 |
| 114H | C=8 | 2945.71 | L . S . Grey .Col .      | 15.9 | 3.5   | 2.5  |
| 114V | C=8 | 2945.71 | L . S . Grey .Col .      | 12.6 | 0.06  | 0.03 |
| 115H | C=8 | 2946.3  | L . S . Grey .Col .Fra   | 17   | 2.6   | 1.6  |
| 115V | C=8 | 2946.3  | L . S . Grey .Col .      | 17.9 | 0.99  | 0.67 |
| 116H | C=8 | 2946.75 | L . S . Grey .Col .      | 7.4  | 2.6   | 1.9  |
| 116V | C=8 | 2946.75 | L . S . Grey .Col .      | 6.7  | 0.41  | 0.26 |
| 117H | C=8 | 2947.2  | L . S . Grey .Col .Comp  | 4.1  | 0.009 | 0    |
| 117V | C=8 | 2947.2  | L . S . Grey .Col .      | 20.1 | 0     | 0    |
| 118H | C=8 | 2947.79 | L . S . Grey .Col .      | 12.7 | 4.3   | 3.2  |
| 118V | C=8 | 2947.79 | L . S . Grey .Col .      | 14.4 | 1.9   | 1.3  |
| 119H | C=8 | 2948.21 | L . S . Grey .Col .      | 14.4 | 0.5   | 0.32 |
| 120H | C=8 | 2948.76 | L . S . Grey .Col .      | 14.7 | 2.9   | 2.1  |
| 120V | C=8 | 2948.76 | L . S . Grey .Col .      | 14.6 | 1.3   | 0.91 |
| 121H | C=8 | 2949.3  | L . S . Grey .Col .      | 4.8  | 0.44  | 0.28 |
| 121V | C=8 | 2949.3  | L . S . Grey .Col .      | 6.6  | 0.68  | 0.45 |
| 122H | C=8 | 2949.83 | L . S . Grey .Col . Comp | 4.8  | 0.002 | 0    |
| 122V | C=8 | 2949.83 | L . S . Grey .Col . Comp | 5.3  | 0.001 | 0    |
| 123H | C=8 | 2950.18 | L . S . Grey .Col .      | 4.6  | 0.014 | 0.01 |
| 123V | C=8 | 2950.18 | L . S . Grey .Col .      | 7.3  | 0.029 | 0.02 |
| 124H | C=8 | 2950.85 | L . S . Grey .Col .      | 9.7  | 1.6   | 1.1  |
| 124V | C=8 | 2950.85 | L . S . Grey .Col .      | 12.5 | 1.6   | 1.1  |
| 125V | C=8 | 2951.3  | L . S . Grey .Col .      | 23.1 | 7.2   | 5.5  |
| 126H | C=8 | 2951.82 | L . S . Grey .Col .      | 6.9  | 0.56  | 0.36 |
| 126V | C=8 | 2951.82 | L . S . Grey .Col .      | 9    | 0.16  | 0.1  |
| 127H | C=8 | 2952.76 | L . S . Grey .Col .      | 18.2 | 2.3   | 1.6  |
| 127V | C=8 | 2952.76 | L . S . Grey .Col .      | 16.8 | 2.2   | 1.6  |
| 128H | C=8 | 2953.17 | L . S . Grey .Col .      | 11.7 | 0.022 | 0.01 |
| 129H | C=9 | 2956.19 | L . S . Grey .Col . Vug  | 12.9 | 8.4   | 6.5  |
| 129V | C=9 | 2956.19 | L . S . Grey .Col .      | 21.2 | 19    | 15   |
| 130H | C=9 | 2956.82 | L . S . Grey .Col . Vug  | 19.5 | 22    | 18   |
| 130V | C=9 | 2956.82 | L . S . Grey .Col .      | 21.1 | 1.6   | 1.1  |
| 131H | C=9 | 2957.05 | L . S . Grey .Col . Comp | 4.7  | 0.007 | 0    |
| 131V | C=9 | 2957.05 | L . S . Grey .Col . Comp | 3.5  | 0.003 | 0    |
| 132H | C=9 | 2957.82 | L . S . Grey .Col .      | 28.5 | 35    | 29   |
| 132V | C=9 | 2957.82 | L . S . Grey .Col .      | 29.6 | 35    | 29   |
| 133H | C=9 | 2958.15 | L . S . Grey .Col .      | 19.3 | 3.1   | 2.2  |
| 133V | C=9 | 2958.15 | L . S . Grey .Col .      | 21.8 | 1.08  | 0.73 |
| 134H | C=9 | 2958.68 | L . S . Grey .Col .      | 13.1 | 1.4   | 1    |
| 134V | C=9 | 2958.68 | L . S . Grey .Col .      | 12.4 | 0.74  | 0.49 |
| 135V | C=9 | 2959.27 | L . S . Grey .Col .      | 23.6 | 5.3   | 4    |
| 136H | C=9 | 2959.9  | L . S . Grey .Col .      | 23.6 | 5.2   | 3.9  |
| 136V | C=9 | 2959.9  | L . S . Grey .Col .      | 21.4 | 3.1   | 2.2  |

|      |      |         |                                |      |       |      |
|------|------|---------|--------------------------------|------|-------|------|
| 137V | C=9  | 2960.15 | L . S . Grey .Col .            | 7.2  | 0.21  | 0.13 |
| 138H | C=9  | 2960.76 | L . S . Grey .Col .            | 7.7  | 0.74  | 0.49 |
| 139H | C=9  | 2961.22 | L . S . .Grey .Col . Vug       | 26.7 | 94    | 83   |
| 139V | C=9  | 2961.22 | L . S . .Grey .Col . Vug       | 27.4 | 109   | 97   |
| 140H | C=9  | 2961.81 | L . S . .Grey .Col . Vug       | 17.1 | 2     | 1.4  |
| 140V | C=9  | 2961.81 | L . S . .Grey .Col .           | 17.3 | 2.7   | 1.9  |
| 141H | C=9  | 2962.39 | L . S . .Grey .Col . Vug       | 24.6 | 36    | 30   |
| 141V | C=9  | 2962.39 | L . S . .Grey .Col .           | 29.2 | 5.7   | 4.3  |
| 142H | C=10 | 2965.21 | L . S . .Grey .Col .           | 18.2 | 1.2   | 0.83 |
| 142V | C=10 | 2965.21 | L . S . .Grey .Col .           | 15.7 | 4.4   | 3.3  |
| 143H | C=10 | 2966.78 | L . S . Light .Grey .Col . Vug | 20.9 | 61    | 53   |
| 143V | C=10 | 2966.78 | L . S . Light .Grey .Col . Vug | 24   | 64    | 55   |
| 144H | C=10 | 2967.72 | L . S . Light .Grey .Col . Fra | 19.6 | 6.9   | 5.2  |
| 144V | C=10 | 2967.72 | L . S . Light .Grey .Col . Vug | 19.1 | 3     | 2.2  |
| 145H | C=10 | 2968.25 | L . S . Light .Grey .Col . Vug | 16.3 | 11.4  | 8.9  |
| 145V | C=10 | 2968.25 | L . S . Light .Grey .Col . Vug | 19   | 8.5   | 6.5  |
| 146H | C=10 | 2968.67 | L . S . Grey .Col . Vug        | 16.2 | 5.6   | 4.2  |
| 146V | C=10 | 2968.67 | L . S . Grey .Col . Vug        | 17.6 | 8.2   | 6.3  |
| 147H | C=10 | 2969.28 | L . S . Grey .Col . Vug        | 15.6 | 10.4  | 8.1  |
| 147V | C=10 | 2969.28 | L . S . Grey .Col . Vug        | 13.5 | 5.8   | 4.4  |
| 148H | C=10 | 2969.8  | L . S . Grey .Col . Vug        | 12.5 | 1.7   | 1.2  |
| 148V | C=10 | 2969.8  | L . S . Grey .Col . Vug        | 13.9 | 15    | 12   |
| 149H | C=10 | 2970.16 | L . S . Grey .Col .            | 24.6 | 33    | 28   |
| 149V | C=10 | 2970.16 | L . S . Grey .Col .            | 18.8 | 45    | 38   |
| 150H | C=10 | 2970.79 | L . S . Grey .Col .            | 28.5 | 93    | 82   |
| 150V | C=10 | 2970.79 | L . S . Grey .Col .            | 22.4 | 34    | 28   |
| 151H | C=10 | 2971.2  | L . S . Grey .Col .            | 19.4 | 25    | 21   |
| 151V | C=10 | 2971.2  | L . S . Grey .Col .            | 22.1 | 123   | 110  |
| 152H | C=10 | 2971.82 | L . S . Grey .Col .            | 23.6 | 40    | 34   |
| 152V | C=10 | 2971.82 | L . S . Grey .Col .            | 24.4 | 25    | 21   |
| 153H | C=10 | 2972.23 | L . S . Grey .Col .            | 17.9 | 14    | 11   |
| 153V | C=10 | 2972.23 | L . S . Grey .Col .            | 23.4 | 120   | 107  |
| 154H | C=10 | 2972.67 | L . S .Light. Grey .Col .      | 23.8 | 189   | 169  |
| 154V | C=10 | 2972.67 | L . S .Light. Grey .Col .      | 23.5 | 154   | 139  |
| 155H | C=10 | 2973.25 | L . S .Light. Grey .Col . Vug  | 14.2 | 7     | 5.3  |
| 155V | C=10 | 2973.25 | L . S .Light. Grey .Col . Vug  | 14.3 | 2.8   | 2    |
| 156H | C=10 | 2973.63 | L . S . Grey .Col . Vug        | 13.5 | 6.1   | 4.6  |
| 156V | C=10 | 2973.63 | L . S .Light. Grey .Col . Vug  | 8.6  | 0.178 | 0.11 |
| 157H | C=10 | 2974.1  | L . S .Light. Grey .Col .      | 23   | 60    | 52   |
| 157V | C=10 | 2974.1  | L . S .Light. Grey .Col .      | 22.6 | 28    | 23   |
| 158H | C=10 | 2974.78 | L . S .Light. Grey .Col .      | 15.3 | 3     | 2.2  |
| 159H | C=10 | 2975.35 | L . S .Light. Grey .Col .      | 24.1 | 37    | 31   |
| 159V | C=10 | 2975.35 | L . S .Light. Grey .Col .      | 22   | 19    | 15   |
| 160H | C=10 | 2975.85 | L . S .Light. Grey .Col .      | 28.6 | 15    | 12   |
| 160V | C=10 | 2975.85 | L . S .Light. Grey .Col .      | 29.3 | 73    | 63   |
| 161H | C=11 | 2976.67 | L . S .Light. Grey .Col .      | 23.8 | 93    | 82   |
| 161V | C=11 | 2976.67 | L . S .Light. Grey .Col .      | 24.3 | 104   | 93   |
| 162H | C=11 | 2977.03 | L . S .Light. Grey .Col . Vug  | 16.9 | 61    | 53   |

|      |      |         |                               |      |      |      |
|------|------|---------|-------------------------------|------|------|------|
| 162V | C=11 | 2977.03 | L . S .Light. Grey .Col . Vug | 19.5 | 12   | 10   |
| 163H | C=11 | 2977.58 | L . S .Light. Grey .Col .     | 15.1 | 10.3 | 8    |
| 163V | C=11 | 2977.58 | L . S .Light. Grey .Col .     | 21.3 | 31   | 26   |
| 164H | C=11 | 2978.15 | L . S .Light. Grey .Col . Vug | 21.5 | 38   | 32   |
| 164V | C=11 | 2978.15 | L . S .Light. Grey .Col . Vug | 23.9 | 49   | 42   |
| 165H | C=11 | 2978.81 | L . S .Light. Grey .Col .     | 24.6 | 43   | 36   |
| 165V | C=11 | 2978.81 | L . S .Light. Grey .Col . Vug | 25.2 | 38   | 32   |
| 166H | C=11 | 2979.72 | L . S .Light. Grey .Col . Vug | 27.5 | 67   | 58   |
| 166V | C=11 | 2979.72 | L . S .Light. Grey .Col . Fra | 25.1 | 36   | 30   |
| 168H | C=11 | 2980.29 | L . S .Light. Grey .Col .     | 24.7 | 30   | 25   |
| 168V | C=11 | 2980.29 | L . S .Light. Grey .Col .     | 26.1 | 31   | 26   |
| 169H | C=11 | 2980.81 | L . S .Light. Grey .Col .     | 25   | 31   | 26   |
| 169V | C=11 | 2980.81 | L . S .Light. Grey .Col .     | 25.1 | 9.8  | 7.6  |
| 170H | C=11 | 2981.15 | L . S .Light. Grey .Col . Vug | 24   | 32   | 27   |
| 170V | C=11 | 2981.15 | L . S .Light. Grey .Col . Vug | 25.3 | 27   | 22   |
| 171H | C=11 | 2981.66 | L . S .Light. Grey .Col .     | 27.3 | 45   | 38   |
| 171V | C=11 | 2981.66 | L . S .Light. Grey .Col .     | 27.7 | 30   | 25   |
| 172H | C=11 | 2982.2  | L . S .Light. Grey .Col . Vug | 16   | 2.1  | 1.5  |
| 172V | C=11 | 2982.2  | L . S .Light. Grey .Col . Vug | 20.6 | 14   | 11   |
| 173H | C=11 | 2982.72 | L . S .Light. Grey .Col .     | 24.2 | 15   | 12   |
| 173V | C=11 | 2982.72 | L . S .Light. Grey .Col . Vug | 27   | 50   | 43   |
| 174H | C=11 | 2983.16 | L . S .Light. Grey .Col . Vug | 26   | 29   | 24   |
| 174V | C=11 | 2983.16 | L . S .Light. Grey .Col . Vug | 25   | 24   | 20   |
| 175H | C=11 | 2984.79 | L . S .Light. Grey .Col . Vug | 21.5 | 19   | 15   |
| 175V | C=11 | 2984.79 | L . S .Light. Grey .Col . Vug | 21.5 | 21   | 17   |
| 176H | C=11 | 2984.84 | L . S .Light. Grey .Col . Vug | 17.1 | 3.2  | 2.3  |
| 176V | C=11 | 2984.84 | L . S .Light. Grey .Col .     | 21.2 | 7    | 5.3  |
| 177H | C=11 | 2985.32 | L . S .Light. Grey .Col . Vug | 20.1 | 3.2  | 2.3  |
| 177V | C=11 | 2985.32 | L . S .Light. Grey .Col . Vug | 22.6 | 2.4  | 1.7  |
| 178H | C=11 | 2985.87 | L . S .Light. Grey .Col .     | 23.4 | 15   | 12   |
| 178V | C=11 | 2985.87 | L . S .Light. Grey .Col .     | 22.8 | 11.1 | 8.7  |
| 179H | C=11 | 2986.15 | L . S .Light. Grey .Col .     | 24.3 | 14   | 11   |
| 179V | C=11 | 2986.15 | L . S .Light. Grey .Col .     | 17.1 | 1.4  | 1    |
| 180H | C=11 | 2987.11 | L . S .Light. Grey .Col . Vug | 26.1 | 31   | 26   |
| 180V | C=11 | 2987.11 | L . S .Light. Grey .Col .     | 28.6 | 28   | 23   |
| 181H | C=11 | 2986.81 | L . S .Light. Grey .Col .     | 23.6 | 19   | 15   |
| 181V | C=11 | 2986.81 | L . S .Light. Grey .Col .     | 26.1 | 23   | 19   |
| 182H | C=11 | 2987.77 | L . S .Light. Grey .Col . Vug | 21.8 | 2.7  | 1.9  |
| 182V | C=11 | 2987.77 | L . S .Light. Grey .Col .     | 25   | 14   | 11   |
| 183H | C=11 | 2988.24 | L . S .Light. Grey .Col .     | 21.8 | 8.5  | 6.5  |
| 183V | C=11 | 2988.24 | L . S .Light. Grey .Col .     | 19.2 | 1.4  | 1    |
| 184H | C=11 | 2988.83 | L . S .Light. Grey .Col .     | 23.1 | 13   | 10   |
| 184V | C=11 | 2988.83 | L . S .Light. Grey .Col .     | 21.9 | 4.5  | 3.3  |
| 185H | C=11 | 2989.36 | L . S .Light. Grey .Col . Vug | 26.3 | 29   | 24   |
| 185V | C=11 | 2989.36 | L . S .Light. Grey .Col . Vug | 23.4 | 22   | 24   |
| 186H | C=11 | 2989.75 | L . S .Light. Grey .Col . Vug | 24.9 | 34   | 28   |
| 186V | C=11 | 2989.75 | L . S .Light. Grey .Col . Vug | 27.2 | 32   | 27   |
| 187H | C=11 | 2990.15 | L . S .Light. Grey .Col .     | 14.5 | 0.26 | 0.16 |

|      |      |         |                               |      |       |      |
|------|------|---------|-------------------------------|------|-------|------|
| 187V | C=11 | 2990.15 | L . S .Light. Grey .Col . Vug | 14.5 | 0.184 | 0.11 |
| 188H | C=11 | 2990.87 | L . S .Light. Grey .Col .     | 23.5 | 1.04  | 0.71 |
| 188V | C=11 | 2990.87 | L . S .Light. Grey .Col .     | 14.9 | 0.65  | 0.43 |
| 189H | C=11 | 2991.19 | L . S .Light. Grey .Col . Vug | 21.8 | 22    | 18   |
| 189V | C=11 | 2991.19 | L . S .Light. Grey .Col .     | 21.6 | 5.1   | 3.8  |
| 190H | C=11 | 2991.72 | L . S .Light. Grey .Col .     | 21.4 | 18    | 15   |
| 190V | C=11 | 2991.72 | L . S .Light. Grey .Col .     | 20.6 | 13    | 10   |
| 191H | C=11 | 2992.07 | L . S .Light. Grey .Col .     | 21.5 | 18    | 15   |
| 191V | C=11 | 2992.07 | L . S .Light. Grey .Col .     | 22.2 | 17    | 14   |
| 192H | C=11 | 2992.88 | L . S .Light. Grey .Col .     | 22.1 | 20    | 16   |
| 192V | C=11 | 2992.88 | L . S .Light. Grey .Col .     | 20.7 | 15    | 12   |
| 193H | C=11 | 2993.22 | L . S .Light. Grey .Col .     | 19.9 | 10.9  | 8.5  |
| 193V | C=11 | 2993.22 | L . S .Light. Grey .Col .     | 21.7 | 16    | 13   |
| 194H | C=11 | 2993.78 | L . S .Light. Grey .Col .     | 21.7 | 18    | 15   |
| 194V | C=11 | 2993.78 | L . S .Light. Grey .Col .     | 22.2 | 10.4  | 8.1  |
| 195H | C=11 | 2994.11 | L . S .Light. Grey .Col .     | 19.7 | 9.8   | 7.6  |
| 195V | C=11 | 2994.11 | L . S .Light. Grey .Col .     | 20.7 | 10.7  | 8.4  |
| 196H | C=12 | 2994.95 | L . S .Light. Grey .Col .     | 21.1 | 6.7   | 5.1  |
| 196V | C=12 | 2994.95 | L . S .Light. Grey .Col .     | 17.8 | 2.9   | 2.1  |
| 197H | C=12 | 2995.17 | L . S .Light. Grey .Col .     | 15.7 | 3.7   | 2.7  |
| 197V | C=12 | 2995.17 | L . S .Light. Grey .Col .     | 15.9 | 1.8   | 1.3  |
| 198H | C=12 | 2995.88 | L . S .Light. Grey .Col .     | 14.2 | 1.2   | 0.83 |
| 198V | C=12 | 2995.88 | L . S .Light. Grey .Col .     | 17.4 | 4     | 2.9  |
| 199H | C=12 | 2996.34 | L . S .Light. Grey .Col .     | 13.2 | 4     | 2.9  |
| 199V | C=12 | 2996.34 | L . S .Light. Grey .Col .     | 16.3 | 2.7   | 1.9  |
| 200H | C=12 | 2996.72 | L . S .Light. Grey .Col .     | 11.8 | 1.7   | 1.2  |
| 200V | C=12 | 2996.72 | L . S .Light. Grey .Col .     | 16.5 | 2.2   | 1.6  |
| 201H | C=12 | 2997.13 | L . S .Light. Grey .Col .     | 16.8 | 4.1   | 3    |
| 201V | C=12 | 2997.13 | L . S .Light. Grey .Col .     | 17.3 | 3.5   | 2.5  |
| 202H | C=12 | 2997.82 | L . S .Grey .Col .            | 16.3 | 4     | 2.9  |
| 202V | C=12 | 2997.82 | L . S .Grey .Col .            | 15   | 3     | 2.2  |
| 203H | C=12 | 2998.24 | L . S .Grey .Col .            | 16.6 | 4     | 2.9  |
| 203V | C=12 | 2998.24 | L . S .Grey .Col .            | 17.7 | 11.9  | 9.3  |
| 204H | C=12 | 2998.74 | L . S .Grey .Col .            | 15.8 | 4.6   | 3.4  |
| 204V | C=12 | 2998.74 | L . S .Grey .Col .            | 15.5 | 5     | 3.7  |
| 205H | C=12 | 2999.11 | L . S .Grey .Col .            | 16.4 | 4.1   | 3    |
| 205V | C=12 | 2999.11 | L . S .Grey .Col .            | 15.9 | 6     | 4.5  |
| 206H | C=12 | 2999.82 | L . S .Grey .Col .            | 13   | 2.7   | 1.9  |
| 206V | C=12 | 2999.82 | L . S .Grey .Col .            | 14   | 2.7   | 1.9  |
| 207H | C=12 | 3000.19 | L . S .Grey .Col .            | 14.2 | 5.1   | 3.8  |
| 207V | C=12 | 3000.19 | L . S .Grey .Col .            | 13.5 | 4.1   | 3    |
| 208H | C=12 | 3000.83 | L . S .Grey .Col .            | 13.6 | 4.5   | 3.3  |
| 208V | C=12 | 3000.83 | L . S .Grey .Col .            | 13.9 | 3.4   | 2.5  |
| 209H | C=12 | 3001.2  | L . S .Grey .Col .            | 12.6 | 1.9   | 1.3  |
| 209V | C=12 | 3001.2  | L . S .Grey .Col .            | 14   | 2.6   | 1.9  |
| 210H | C=12 | 3001.73 | L . S .Grey .Col .            | 11.8 | 1.02  | 0.63 |
| 210V | C=12 | 3001.73 | L . S .Grey .Col .            | 10   | 0.66  | 0.44 |
| 211H | C=12 | 3002.09 | L . S .Grey .Col .            | 11.3 | 0.66  | 0.44 |

|      |      |         |                                |      |       |      |
|------|------|---------|--------------------------------|------|-------|------|
| 211V | C=12 | 3002.09 | L . S .Grey .Col .             | 10.5 | 0.3   | 0.19 |
| 212H | C=12 | 3002.77 | L . S .Grey .Col .             | 15.2 | 2.6   | 1.9  |
| 212V | C=12 | 3002.77 | L . S .Grey .Col .             | 17   | 2.9   | 2.1  |
| 213H | C=12 | 3003.17 | L . S .Grey .Col .             | 15.5 | 4.1   | 3    |
| 213V | C=12 | 3003.17 | L . S .Grey .Col .             | 16.8 | 3.9   | 2.9  |
| 214H | C=12 | 3003.74 | L . S .Grey .Col .             | 13.2 | 0.57  | 0.37 |
| 214V | C=12 | 3003.74 | L . S .Grey .Col .             | 13.4 | 0.46  | 0.29 |
| 215H | C=12 | 3004.16 | L . S .Grey .Col . Comp        | 8.8  | 0.014 | 0.01 |
| 215V | C=12 | 3004.16 | L . S .Grey .Col . Comp        | 9.4  | 0.016 | 0.01 |
| 216H | C=12 | 3004.67 | L . S .Grey .Col . Comp        | 7.6  | 0.002 | 0    |
| 216V | C=12 | 3004.67 | L . S .Grey .Col . Comp        | 6.7  | 0.002 | 0    |
| 217H | C=12 | 3005.12 | L . S .Grey .Col .             | 11.1 | 0.203 | 0.12 |
| 217V | C=12 | 3005.12 | L . S .Grey .Col .             | 13.5 | 0.46  | 0.29 |
| 218H | C=12 | 3005.89 | L . S .Grey .Col .             | 14   | 1.01  | 0.63 |
| 218V | C=12 | 3005.89 | L . S .Grey .Col .             | 11.8 | 0.35  | 0.22 |
| 219H | C=12 | 3006.22 | L . S .Grey .Col . Comp        | 5.9  | 0.003 | 0    |
| 219V | C=12 | 3006.22 | L . S .Grey .Col . Comp        | 6.7  | 0.004 | 0    |
| 220H | C=12 | 3006.24 | L . S .darck .Grey .Col . Comp | 5.6  | 0.007 | 0    |
| 220V | C=12 | 3006.24 | L . S .darck .Grey .Col . Comp | 4.7  | 0.004 | 0    |
| 221H | C=12 | 3007.16 | L . S .darck .Grey .Col . Comp | 5.3  | 0.012 | 0.01 |
| 221V | C=12 | 3007.16 | L . S .darck .Grey .Col . Comp | 6.9  | 0.014 | 0.01 |
| 222H | C=12 | 3007.77 | L . S .darck .Grey .Col . Comp | 6.1  | 0.1   | 0.01 |
| 222V | C=12 | 3007.77 | L . S .darck .Grey .Col . Comp | 6.7  | 0.009 | 0    |
| 223H | C=12 | 3008.11 | L . S .darck .Grey .Col . Comp | 2.6  | 0.004 | 0    |
| 223V | C=12 | 3008.11 | L . S .darck .Grey .Col . Comp | 4.6  | 0.002 | 0    |
| 224H | C=12 | 3008.69 | L . S .darck .Grey .Col . Comp | 4.1  | 0.005 | 0    |
| 224V | C=12 | 3008.69 | L . S .darck .Grey .Col . Comp | 2.8  | 0.004 | 0    |
| 225H | C=12 | 3009.23 | L . S .darck .Grey .Col . Comp | 2.9  | 0.004 | 0    |
| 225V | C=12 | 3009.23 | L . S .darck .Grey .Col . Comp | 5.3  | 0.003 | 0    |
| 226H | C=12 | 3009.82 | L . S . Grey .Col . Comp       | 3    | 0.002 | 0    |
| 226V | C=12 | 3009.82 | L . S . Grey .Col . Comp       | 2.1  | 0.002 | 0    |
| 227H | C=12 | 3010.24 | L . S . Grey .Col . Comp       | 5.4  | 0.001 | 0    |
| 227V | C=12 | 3010.24 | L . S . Grey .Col . Comp       | 6.1  | 0.002 | 0    |
| 228V | C=12 | 3012.12 | L . S . Grey .Col . Comp       | 2.8  | 0.009 | 0    |
| 229H | C=13 | 3030.23 | L . S . Grey .Col . Fra        | 15.9 | 28    | 23   |
| 229V | C=13 | 3030.23 | L . S . Grey .Col . Fra        | 17.6 | 41    | 35   |
| 230H | C=13 | 3030.72 | L . S . Grey .Col . Fra        | 21.1 | 10.1  | 7.9  |
| 230V | C=13 | 3030.72 | L . S . Grey .Col . Fra        | 19.6 | 2.5   | 1.8  |
| 231H | C=13 | 3031.4  | L . S . Grey .Col . Fra        | 11.2 | 1.3   | 0.91 |
| 231V | C=13 | 3031.4  | L . S . Grey .Col . Fra        | 16.9 | 1.06  | 0.72 |
| 232H | C=13 | 3031.83 | L . S . Grey .Col . Fra        | 17.5 | 6.1   | 4.6  |
| 232V | C=13 | 3031.83 | L . S . Grey .Col . Fra        | 13.5 | 2.2   | 1.6  |
| 233H | C=13 | 3032.25 | L . S . Grey .Col . Fra        | 10.8 | 13    | 10   |
| 234H | C=13 | 3032.69 | L . S . Grey .Col .            | 9.4  | 0.3   | 0.19 |
| 234V | C=13 | 3032.69 | L . S . Grey .Col .            | 14.8 | 11.6  | 9.1  |
| 235V | C=13 | 3033.31 | L . S . Grey .Col .            | 16   | 3.1   | 2.2  |
| 236H | C=13 | 3033.78 | L . S . Grey .Col . Fra        | 18.7 | 10.3  | 8    |
| 236V | C=13 | 3033.78 | L . S . Grey .Col . Fra        | 15.3 | 6     | 4.5  |

|      |      |         |                            |      |        |       |
|------|------|---------|----------------------------|------|--------|-------|
| 237H | C=13 | 3034.15 | L . S . Grey .Col . Fra    | 17.5 | 2.9    | 2.1   |
| 237V | C=13 | 3034.15 | L . S . Grey .Col . Fra    | 17.2 | 35     | 29    |
| 238H | C=13 | 3034.86 | L . S . Grey .Col .        | 12.3 | 5.3    | 4     |
| 238V | C=13 | 3034.86 | L . S . Grey .Col .        | 13.8 | 4.9    | 3.7   |
| 239H | C=13 | 3035.14 | L . S . Grey .Col .        | 10.9 | 0.155  | 0.09  |
| 239V | C=13 | 3035.14 | L . S . Grey .Col .        | 12.3 | 0.191  | 0.12  |
| 240H | C=13 | 3035.59 | L . S . Grey .Col .        | 16.5 | 5.3    | 4     |
| 240V | C=13 | 3035.59 | L . S . Grey .Col .        | 12   | 0.93   | 0.63  |
| 241H | C=13 | 3036.28 | L . S . Darck .Grey .Col . | 10.8 | 0.91   | 0.61  |
| 242H | C=13 | 3036.89 | L . S . Darck .Grey .Col . | 11   | 0.24   | 0.15  |
| 242V | C=13 | 3036.89 | L . S . Darck .Grey .Col . | 7    | 0.34   | 0.02  |
| 243H | C=13 | 3037.13 | L . S . .Grey .Col .       | 10.3 | 0.27   | 0.17  |
| 243V | C=13 | 3037.13 | L . S . .Grey .Col .       | 10.7 | 0.23   | 0.14  |
| 244H | C=13 | 3037.68 | L . S . .Grey .Col .       | 10   | 0.84   | 0.56  |
| 245H | C=13 | 3038.31 | L . S . .Grey .Col .       | 7.4  | 0.023  | 0.01  |
| 245V | C=13 | 3038.31 | L . S . .Grey .Col .       | 7.6  | 0.0159 | 0.01  |
| 246H | C=13 | 3039.75 | L . S . .Grey .Col .       | 9    | 0.018  | 0.01  |
| 246V | C=13 | 3039.75 | L . S . .Grey .Col .       | 7.5  | 0.13   | 0.01  |
| 247H | C=13 | 3039.2  | L . S . .Grey .Col . Comp  | 4.6  | 0.005  | 0     |
| 247V | C=13 | 3039.2  | L . S . .Grey .Col . Comp  | 5.4  | 0.007  | 0     |
| 248H | C=13 | 3039.83 | L . S . .Grey .Col . Comp  | 5.9  | 0.034  | 0.02  |
| 248V | C=13 | 3039.83 | L . S . .Grey .Col . Comp  | 6.9  | 0.116  | 0.07  |
| 249H | C=13 | 3040.13 | L . S . .Grey .Col . Comp  | 4.5  | 0.004  | 0     |
| 249V | C=13 | 3040.13 | L . S . .Grey .Col . Comp  | 5.6  | 0.005  | 0     |
| 250H | C=13 | 3041.1  | L . S . .Grey .Col . Comp  | 4    | 0.045  | 0.02  |
| 250V | C=13 | 3041.1  | L . S . .Grey .Col . Comp  | 4.6  | 0.018  | 0.01  |
| 251V | C=13 | 3011.71 | L . S . .Grey .Col . Comp  | 7.1  | 0.098  | 0.06  |
| 252H | C=13 | 3042.05 | L . S . .Grey .Col . Comp  | 8.2  | 0.017  | 0.01  |
| 252V | C=13 | 3042.05 | L . S . .Grey .Col . Comp  | 5.7  | 0.01   | 0.01  |
| 253H | C=13 | 3042.8  | L . S . .Grey .Col .       | 6.5  | 0.138  | 0.08  |
| 253V | C=13 | 3042.8  | L . S . .Grey .Col .       | 7.1  | 0.024  | 0.01  |
| 254H | C=13 | 3043.24 | L . S . .Grey .Col .       | 8.8  | 0.13   | 0.08  |
| 254V | C=13 | 3043.24 | L . S . .Grey .Col .       | 9.8  | 0.129  | 0.08  |
| 255H | C=13 | 3043.7  | L . S . .Grey .Col .       | 9.2  | 0.067  | 0.04  |
| 255V | C=13 | 3043.7  | L . S . .Grey .Col .       | 7.7  | 0.038  | 0.02  |
| 256H | C=13 | 3044.14 | L . S . .Grey .Col .       | 5.6  | 0.042  | 0.02  |
| 256V | C=13 | 3044.14 | L . S . .Grey .Col .       | 6.6  | 0.024  | 0.01  |
| 257H | C=13 | 3044.72 | L . S . .Grey .Col .       | 18.8 | 9.6    | 7.1   |
| 257V | C=13 | 3044.72 | L . S . .Grey .Col .       | 7    | 0.31   | 0.019 |
| 258H | C=13 | 3045.22 | L . S . .Grey .Col .       | 11.3 | 0.77   | 0.52  |
| 258V | C=13 | 3045.22 | L . S . .Grey .Col .       | 8.3  | 0.175  | 0.11  |
| 259H | C=13 | 3045.74 | L . S . .Grey .Col .       | 7.5  | 0.71   | 0.1   |
| 259V | C=13 | 3045.74 | L . S . .Grey .Col .       | 16.6 | 1.4    | 1     |
| 260H | C=13 | 3046.09 | L . S . .Grey .Col .       | 6.9  | 0.23   | 0.14  |
| 260V | C=13 | 3046.09 | L . S . .Grey .Col .       | 8.2  | 0.11   | 0.06  |
| 261H | C=13 | 3046.81 | L . S . .Grey .Col . Vug   | 13.5 | 2.5    | 1.8   |
| 261V | C=13 | 3046.81 | L . S . .Grey .Col . Vug   | 15.3 | 3.7    | 2.7   |
| 262H | C=13 | 3047.15 | L . S . .Grey .Col . Vug   | 14.1 | 4.9    | 3.7   |



|      |      |         |                                |      |       |      |
|------|------|---------|--------------------------------|------|-------|------|
| 262V | C=13 | 3047.15 | L . S . .Grey .Col . Vug       | 16.9 | 6.1   | 4.6  |
| 263H | C=13 | 3052.22 | L . S . .Grey .Col . Vug       | 17.3 | 11.3  | 8.8  |
| 263V | C=13 | 3052.22 | L . S . .Grey .Col . Vug       | 19.2 | 20    | 26   |
| 264H | C=13 | 3052.78 | L . S . .Grey .Col .           | 17.8 | 11    | 8.6  |
| 264V | C=13 | 3052.78 | L . S . .Grey .Col .           | 19.3 | 8.1   | 6.2  |
| 265H | C=13 | 3053.28 | L . S . .Grey .Col . Vug       | 19.5 | 15    | 12   |
| 265V | C=13 | 3053.28 | L . S . .Grey .Col . Vug       | 18.3 | 10.1  | 7.6  |
| 266H | C=13 | 3053.74 | L . S . .Grey .Col . Vug       | 23.9 | 27    | 22   |
| 266V | C=13 | 3053.74 | L . S . .Grey .Col . Vug       | 24.9 | 24    | 20   |
| 267H | C=14 | 3054.24 | L . S . .Grey .Col . Vug       | 22   | 25    | 21   |
| 267V | C=14 | 3054.24 | L . S . .Grey .Col . Vug       | 18.7 | 1.9   | 1.3  |
| 268H | C=14 | 3054.68 | L . S . .Grey .Col .           | 21.5 | 14    | 11   |
| 268V | C=14 | 3054.68 | L . S . .Grey .Col .           | 22.5 | 10.9  | 8.5  |
| 269H | C=14 | 3055.19 | L . S . .Grey .Col .           | 15.6 | 13    | 10   |
| 269V | C=14 | 3055.19 | L . S . .Grey .Col .           | 15.6 | 3.2   | 2.3  |
| 270H | C=14 | 3055.68 | L . S . .Grey .Col .           | 7.7  | 0.55  | 0.35 |
| 270V | C=14 | 3055.68 | L . S . .Grey .Col .           | 7.6  | 0.097 | 0.66 |
| 271H | C=14 | 3056.32 | L . S . Light .Grey .Col .     | 23.2 | 14    | 11   |
| 271V | C=14 | 3056.32 | L . S . Light .Grey .Col .     | 23.6 | 13    | 10   |
| 272H | C=14 | 3056.84 | L . S . Light .Grey .Col . Vug | 26.5 | 28    | 23   |
| 272V | C=14 | 3056.84 | L . S . Light .Grey .Col . Vug | 23.9 | 12    | 10   |
| 273H | C=14 | 3057.26 | L . S . Light .Grey .Col . Vug | 26.9 | 35    | 29   |
| 273V | C=14 | 3057.26 | L . S . Light .Grey .Col . Vug | 25.1 | 15    | 12   |
| 274H | C=14 | 3057.79 | L . S . .Grey .Col .           | 26.7 | 43    | 36   |
| 274V | C=14 | 3057.79 | L . S . .Grey .Col .           | 22.6 | 9.2   | 7.1  |
| 275H | C=14 | 3058.14 | L . S . Light .Grey .Col .     | 24   | 12    | 10   |
| 275V | C=14 | 3058.14 | L . S . Light .Grey .Col .     | 22.8 | 4.3   | 3.2  |
| 276H | C=14 | 3058.7  | L . S . Light .Grey .Col .     | 24.9 | 15    | 12   |
| 276V | C=14 | 3058.7  | L . S . Light .Grey .Col .     | 25.1 | 15    | 12   |
| 277H | C=14 | 3059.12 | L . S . Light .Grey .Col .     | 21.7 | 6.5   | 4.9  |
| 277V | C=14 | 3059.12 | L . S . Light .Grey .Col .     | 20.2 | 3.1   | 2.2  |
| 278H | C=14 | 3059.77 | L . S . Light .Grey .Col .     | 23.9 | 4.6   | 3.4  |
| 278V | C=14 | 3059.77 | L . S . Light .Grey .Col .     | 24.7 | 8.5   | 6.5  |
| 279H | C=14 | 3060.2  | L . S . Light .Grey .Col . Vug | 25.7 | 12    | 10   |
| 279V | C=14 | 3060.2  | L . S . Light .Grey .Col . Vug | 23.6 | 10.4  | 8.1  |
| 280H | C=14 | 3063.14 | L . S . Light .Grey .Col . Vug | 24.1 | 22    | 18   |
| 280V | C=14 | 3063.14 | L . S . Light .Grey .Col . Vug | 26.3 | 17    | 14   |
| 281H | C=14 | 3063.91 | L . S . Light .Grey .Col .     | 25.6 | 8.5   | 6.5  |
| 281V | C=14 | 3063.91 | L . S . Light .Grey .Col .     | 24.6 | 10.6  | 8.3  |
| 282H | C=14 | 3064.27 | L . S . Light .Grey .Col .     | 26.1 | 9.8   | 7.6  |
| 282V | C=14 | 3064.27 | L . S . Light .Grey .Col .     | 27.5 | 14    | 11   |
| 283H | C=14 | 3064.72 | L . S . Light .Grey .Col . Vug | 26.9 | 41    | 35   |
| 283V | C=14 | 3064.72 | L . S . Light .Grey .Col . Vug | 24.6 | 33    | 28   |
| 284H | C=14 | 3065.15 | L . S .Grey .Col . Vug         | 23.2 | 29    | 24   |
| 284V | C=14 | 3065.15 | L . S .Grey .Col . Vug         | 21.3 | 16    | 13   |
| 285H | C=14 | 3065.82 | L . S .Grey .Col . Vug         | 23.6 | 14    | 11   |
| 286H | C=14 | 3066.04 | L . S .Grey .Col . Vug         | 27.2 | 44    | 37   |
| 286V | C=14 | 3066.04 | L . S .Grey .Col . Vug         | 23.8 | 194   | 174  |

|      |      |         |                          |      |     |     |
|------|------|---------|--------------------------|------|-----|-----|
| 287H | C=14 | 3066.72 | L . S . Grey . Col . Vug | 24.5 | 37  | 31  |
| 287V | C=14 | 3066.72 | L . S . Grey . Col . Vug | 24.7 | 356 | 326 |
| 288H | C=14 | 3067.16 | L . S . Grey . Col .     | 24.1 | 12  | 10  |
| 288V | C=14 | 3067.16 | L . S . Grey . Col .     | 25.6 | 32  | 27  |
| 289H | C=14 | 3067.68 | L . S . Grey . Col .     | 22.9 | 24  | 20  |
| 289V | C=14 | 3067.68 | L . S . Grey . Col .     | 25.2 | 22  | 18  |

**Table S2** The detailed results of porosity and permeability in well AM3, in addition to core numbers and depth of each measurement sample.

| Khasib Formation |         |           |                    |            |                       |                                       |
|------------------|---------|-----------|--------------------|------------|-----------------------|---------------------------------------|
| Sample No        | Core No | Depth (m) | Nature             | Porosity % | Permeability air (md) | Slip corrected: Air Permeability (md) |
| 1H               | C=1     | 2852.14   | L . S . Grey . Col | 15         | 0.26                  | 0.16                                  |
| 1V               | C=1     | 2852.14   | L . S . Grey . Col | 15.9       | 0.128                 | 0.07                                  |
| 2H               | C=1     | 2852.58   | L . S . Grey . Col | 22.8       | 2.3                   | 1.6                                   |
| 2V               | C=1     | 2852.58   | L . S . Grey . Col | 22.5       | 1.6                   | 1.1                                   |
| 3H               | C=1     | 2853.04   | L . S . Grey . Col | 18.6       | 0.9                   | 0.6                                   |
| 3V               | C=1     | 2853.04   | L . S . Grey . Col | 16.7       | 0.175                 | 0.11                                  |
| 4H               | C=1     | 2853.78   | L . S . Grey . Col | 16.5       | 1.3                   | 0.91                                  |
| 4V               | C=1     | 2853.78   | L . S . Grey . Col | 17.9       | 0.12                  | 0.1                                   |
| 5H               | C=1     | 2854.13   | L . S . Grey . Col | 19.7       | 0.88                  | 0.59                                  |
| 5V               | C=1     | 2854.13   | L . S . Grey . Col | 17.9       | 0.221                 | 0.13                                  |
| 6H               | C=1     | 2854.69   | L . S . Grey . Col | 17.3       | 0.219                 | 0.13                                  |
| 6V               | C=1     | 2854.69   | L . S . Grey . Col | 16.7       | 0.27                  | 0.17                                  |
| 7H               | C=1     | 2855.08   | L . S . Grey . Col | 20.1       | 0.5                   | 0.32                                  |
| 7V               | C=1     | 2855.08   | L . S . Grey . Col | 20.4       | 0.26                  | 0.16                                  |
| 8H               | C=1     | 2855.8    | L . S . Grey . Col | 20         | 0.67                  | 0.44                                  |
| 8V               | C=1     | 2855.8    | L . S . Grey . Col | 18         | 0.154                 | 0.9                                   |
| 9H               | C=1     | 2856.22   | L . S . Grey . Col | 21.1       | 0.73                  | 0.48                                  |
| 9V               | C=1     | 2856.22   | L . S . Grey . Col | 20.4       | 0.23                  | 0.14                                  |
| 10H              | C=1     | 2856.86   | L . S . Grey . Col | 16.5       | 0.03                  | 0.02                                  |
| 10V              | C=1     | 2856.86   | L . S . Grey . Col | 17.4       | 0.016                 | 0.01                                  |
| 11H              | C=1     | 2857.21   | L . S . Grey . Col | 15.2       | 0.03                  | 0.02                                  |
| 11V              | C=1     | 2857.21   | L . S . Grey . Col | 17.3       | 0.014                 | 0.01                                  |
| 12H              | C=1     | 2857.72   | L . S . Grey . Col | 14.1       | 0.025                 | 0.01                                  |
| 12V              | C=1     | 2857.72   | L . S . Grey . Col | 13.4       | 0.014                 | 0.02                                  |
| 13H              | C=1     | 2858.15   | L . S . Grey . Col | 13.2       | 0.034                 | 0.01                                  |
| 13V              | C=1     | 2858.15   | L . S . Grey . Col | 14         | 0.016                 | 0.01                                  |
| 14H              | C=1     | 2858.8    | L . S . Grey . Col | 11.1       | 0.027                 | 0                                     |

|     |     |         |                         |      |       |      |
|-----|-----|---------|-------------------------|------|-------|------|
| 14V | C=1 | 2858.8  | L . S . Grey .Col       | 10   | 0.002 | 0    |
| 15H | C=1 | 2859.25 | L . S . Grey .Col       | 14.6 | 0.009 | 0    |
| 15V | C=1 | 2859.25 | L . S . Grey .Col       | 13.3 | 0.004 | 0    |
| 16H | C=1 | 2859.69 | L . S . Grey .Col       | 11.9 | 0.007 | 0    |
| 16V | C=1 | 2859.69 | L . S . Grey .Col       | 11.3 | 0.007 | 0    |
| 17H | C=1 | 2860.14 | L . S . Grey .Col       | 15.8 | 0.02  | 0.01 |
| 17V | C=1 | 2860.14 | L . S . Grey .Col       | 13.4 | 0.009 | 0    |
| 18H | C=1 | 2860.9  | L . S . Grey .Col       | 12.6 | 1     | 0.68 |
| 18V | C=1 | 2860.9  | L . S . Grey .Col       | 14   | 0.004 | 0    |
| 19H | C=1 | 2861.14 | L . S . Grey .Col       | 12.1 | 0.038 | 0.02 |
| 19V | C=1 | 2861.14 | L . S . Grey .Col       | 11.9 | 0.179 | 0.11 |
| 20H | C=1 | 2861.92 | L . S . Grey .Col       | 8.8  | 0.027 | 0.01 |
| 20V | C=1 | 2861.92 | L . S . Grey .Col       | 15.6 | 0.029 | 0.02 |
| 21H | C=1 | 2862.22 | L . S . Grey .Col       | 16.9 | 0.115 | 0.07 |
| 21V | C=1 | 2862.22 | L . S . Grey .Col       | 16.3 | 0.018 | 0.01 |
| 22H | C=1 | 2862.69 | L . S . Grey .Col       | 15.4 | 0.027 | 0.01 |
| 22V | C=1 | 2862.69 | L . S . Grey .Col       | 14.6 | 0.014 | 0.01 |
| 23H | C=1 | 2863.21 | L . S . Grey .Col       | 11.2 | 0.4   | 0.26 |
| 23V | C=1 | 2863.21 | L . S . Grey .Col       | 15.1 | 0.112 | 0.07 |
| 24H | C=1 | 2863.7  | L . S . Grey .Col       | 13   | 0.44  | 0.28 |
| 24V | C=1 | 2863.7  | L . S . Grey .Col       | 19.7 | 0.55  | 0.36 |
| 25H | C=1 | 2864.38 | L . S . Grey .Col       | 21   | 0.188 | 0.11 |
| 25V | C=1 | 2864.38 | L . S . Grey .Col       | 19.7 | 0.047 | 0.03 |
| 26H | C=1 | 2864.82 | L . S . Grey .Col       | 9.9  | 0.049 | 0.03 |
| 26V | C=1 | 2864.82 | L . S . Grey .Col       | 8.9  | 0.048 | 0.03 |
| 27H | C=1 | 2865.26 | L . S . Grey .Col       | 15.1 | 0.116 | 0.07 |
| 27V | C=1 | 2865.26 | L . S . Grey .Col       | 12.8 | 0.029 | 0.02 |
| 28H | C=1 | 2866.22 | L . S . Grey .Col       | 16.4 | 0.029 | 0.02 |
| 28V | C=1 | 2866.22 | L . S . Grey .Col       | 16   | 0.118 | 0.07 |
| 29H | C=1 | 2866.66 | L . S . Grey .Col       | 17.3 | 0.034 | 0.02 |
| 29V | C=1 | 2866.66 | L . S . Grey .Col       | 19   | 3.5   | 2.5  |
| 30H | C=1 | 2867.08 | L . S . Grey .Col       | 17.1 | 0.049 | 0.03 |
| 30V | C=1 | 2867.08 | L . S . Grey .Col       | 11.6 | 0.02  | 0.01 |
| 31H | C=1 | 2899.17 | L . S . Grey .Col .Comp | 2.2  | 0.009 | 0    |
| 31V | C=1 | 2899.17 | L . S . Grey .Col .Comp | 3    | 0.009 | 0    |
| 32H | C=1 | 2899.77 | L . S . Grey .Col       | 12.9 | 0.41  | 0.26 |
| 32V | C=1 | 2899.77 | L . S . Grey .Col       | 19   | 2.5   | 1.8  |
| 33H | C=2 | 2900.27 | L . S . Grey .Col       | 19   | 3.4   | 2.5  |
| 33V | C=2 | 2900.27 | L . S . Grey .Col       | 19.4 | 4.7   | 3.5  |
| 34H | C=2 | 2900.73 | L . S . Grey .Col       | 14.2 | 1.07  | 0.73 |
| 34V | C=2 | 2900.73 | L . S . Grey .Col       | 14.6 | 0.174 | 0.1  |

|                   |     |         |                         |      |       |      |
|-------------------|-----|---------|-------------------------|------|-------|------|
| 35H               | C=2 | 2901.15 | L . S . Grey .Col       | 9.1  | 0.5   | 0.32 |
| 35V               | C=2 | 2901.15 | L . S . Grey .Col       | 7.9  | 0.02  | 0.01 |
| 36H               | C=2 | 2901.8  | L . S . Grey .Col .Comp | 2.9  | 0.007 | 0    |
| 36V               | C=2 | 2901.8  | L . S . Grey .Col .Comp | 2.4  | 0.003 | 0    |
| 37V               | C=2 | 2902.31 | L . S . Grey .Col       | 20.4 | 2.9   | 2.1  |
| 37H               | C=2 | 2902.31 | L . S . Grey .Col       | 18.5 | 0.85  | 0.57 |
| 38H               | C=2 | 2902.82 | L . S . Grey .Col       | 12.8 | 1.7   | 1.2  |
| 38V               | C=2 | 2902.82 | L . S . Grey .Col       | 17.1 | 1.5   | 1    |
| 39H               | C=2 | 2903.11 | L . S . Grey .Col       | 14.9 | 0.47  | 0.3  |
| 39V               | C=2 | 2903.11 | L . S . Grey .Col       | 13.5 | 0.38  | 0.02 |
| 40H               | C=2 | 2903.63 | L . S . Grey .Col       | 13.6 | 0.42  | 0.27 |
| 40V               | C=2 | 2903.63 | L . S . Grey .Col       | 16.8 | 0.21  | 0.13 |
| 41H               | C=2 | 2904.3  | L . S . Grey .Col       | 19.4 | 3.1   | 2.2  |
| 41V               | C=2 | 2904.3  | L . S . Grey .Col       | 20.2 | 3.2   | 2.3  |
| 42H               | C=2 | 2904.88 | L . S . Grey .Col       | 20.6 | 1     | 0.68 |
| 42V               | C=2 | 2904.88 | L . S . Grey .Col       | 17.7 | 0.4   | 0.26 |
| 43H               | C=2 | 2905.24 | L . S . Grey .Col . Vug | 21.7 | 2.8   | 2    |
| 44H               | C=2 | 2905.77 | L . S . Grey .Col       | 23.8 | 1.5   | 1    |
| 44V               | C=2 | 2905.77 | L . S . Grey .Col       | 23.2 | 1.4   | 1    |
| 45H               | C=2 | 2906.33 | L . S . Grey .Col       | 22.8 | 3.4   | 2.5  |
| 45V               | C=2 | 2906.33 | L . S . Grey .Col       | 22.7 | 1.4   | 1    |
| 46H               | C=2 | 2906.66 | L . S . Grey .Col       | 21.8 | 2.8   | 2    |
| 46V               | C=2 | 2906.66 | L . S . Grey .Col       | 22.5 | 1.2   | 0.83 |
| 47H               | C=2 | 2907.2  | L . S . Grey .Col       | 8.32 | 1.6   | 1.1  |
| 47V               | C=2 | 2907.2  | L . S . Grey .Col       | 22.6 | 3.3   | 2.4  |
| 48H               | C=2 | 2907.73 | L . S . Grey .Col       | 19.6 | 0.92  | 0.62 |
| 48V               | C=2 | 2907.73 | L . S . Grey .Col       | 20.6 | 0.99  | 0.67 |
| 49H               | C=2 | 2908.18 | L . S . Grey .Col       | 14.7 | 0.519 | 0.34 |
| Mishrif formation |     |         |                         |      |       |      |
| 58H               | C=3 | 2920.11 | L . S . Grey .Col .     | 9.7  | 3.6   | 2.6  |
| 58V               | C=3 | 2920.11 | L . S . Grey .Col .     | 9    | 1.2   | 0.83 |
| 59H               | C=3 | 2922.38 | L . S . Grey .Col . Vug | 9.3  | 1.5   | 1    |
| 59V               | C=3 | 2922.38 | L . S . Grey .Col . Vug | 9.2  | 2     | 1.4  |
| 60H               | C=3 | 2923.17 | L . S . Grey .Col . Vug | 1.4  | 0.46  | 0.29 |
| 60V               | C=3 | 2923.17 | L . S . Grey .Col . Vug | 2.8  | 0.168 | 0.1  |
| 61H               | C=3 | 2924.22 | L . S . Grey .Col .     | 2.7  | 0.219 | 0.13 |
| 61V               | C=3 | 2924.22 | L . S . Grey .Col .     | 3.4  | 0.052 | 0.03 |
| 62H               | C=3 | 2924.7  | L . S . Grey .Col .     | 4.8  | 0.55  | 0.35 |
| 62V               | C=3 | 2924.7  | L . S . Grey .Col .     | 9    | 0.61  | 0.4  |
| 63H               | C=3 | 2925.13 | L . S . Grey .Col . Vug | 2.7  | 0.49  | 0.32 |

|     |     |         |                             |      |       |      |
|-----|-----|---------|-----------------------------|------|-------|------|
| 63V | C=3 | 2925.13 | L . S . Grey .Col . Vug     | 1.3  | 0.032 | 0.02 |
| 64H | C=3 | 2925.83 | L . S . Grey .Col . Vug     | 3.4  | 0.94  | 0.64 |
| 65H | C=4 | 2934.07 | L . S . Grey .Col . Vug     | 10.5 | 1.4   | 1    |
| 65V | C=4 | 2934.07 | L . S . Grey .Col . Vug     | 7.7  | 4.6   | 2.9  |
| 66H | C=4 | 2935.36 | L . S . Grey .Col . Vug     | 10.5 | 2.3   | 1.6  |
| 66V | C=4 | 2934.36 | L . S . Grey .Col . Vug     | 8.4  | 9.4   | 7.3  |
| 67H | C=4 | 2936.17 | L . S . Grey .Col .         | 9    | 2.1   | 1.5  |
| 68H | C=4 | 2939.2  | L . S . Grey .Col .         | 5.3  | 0.036 | 0.02 |
| 68V | C=4 | 2939.2  | L . S . Grey .Col .         | 3.3  | 0.057 | 0.03 |
| 69H | C=4 | 2939.65 | L . S . Grey .Col .         | 4.7  | 4     | 2.9  |
| 70H | C=5 | 2951.37 | L . S . Grey .Col . Vug     | 11.9 | 8.9   | 6.9  |
| 70V | C=5 | 2951.37 | L . S . Grey .Col . Vug     | 14   | 7.1   | 5.4  |
| 71H | C=5 | 2951.85 | L . S . Grey .Col . Vug     | 22.3 | 2.82  | 2.62 |
| 71V | C=5 | 2951.85 | L . S . Grey .Col . Vug     | 16.2 | 16    | 13   |
| 72H | C=5 | 2952.17 | L . S . Grey .Col . Vug     | 11.1 | 1.8   | 1.3  |
| 72V | C=5 | 2952.17 | L . S . Grey .Col . Vug     | 3.5  | 0.23  | 0.14 |
| 73H | C=5 | 2952.65 | L . S . Grey .Col . Vug     | 10.4 | 1.3   | 0.91 |
| 73V | C=5 | 2952.65 | L . S . Grey .Col . Brolcen | 12.7 | 0     | 0    |
| 74H | C=5 | 2954.94 | L . S . Grey .Col .         | 6.7  | 0.05  | 0.03 |
| 75H | C=5 | 2955.28 | L . S . Grey .Col . Brolcen | 6.3  | 0     | 0    |
| 75V | C=5 | 2955.28 | L . S . Grey .Col .         | 5.6  | 0.66  | 0.44 |
| 76H | C=5 | 2955.71 | L . S . Grey .Col .         | 2.1  | 0.098 | 0.06 |
| 76V | C=5 | 2955.71 | L . S . Grey .Col .         | 4.7  | 0.04  | 0.02 |
| 77H | C=5 | 2956.14 | L . S . Grey .Col .         | 1.3  | 0.014 | 0.01 |
| 77V | C=5 | 2956.14 | L . S . Grey .Col .         | 1.3  | 0.116 | 0.07 |
| 78H | C=5 | 2955.89 | L . S . Grey .Col .         | 1.3  | 0.056 | 0.03 |
| 78V | C=5 | 2955.89 | L . S . Grey .Col .         | 1.1  | 0.027 | 0.01 |
| 79H | C=5 | 2957.24 | L . S . Grey .Col .         | 1.4  | 0.33  | 0.21 |
| 79V | C=5 | 2957.24 | L . S . Grey .Col .         | 0.6  | 0.007 | 0    |
| 80H | C=5 | 2957.68 | L . S . Grey .Col .         | 2.7  | 0.169 | 0.1  |
| 80V | C=5 | 2957.68 | L . S . Grey .Col .         | 0.7  | 0.016 | 0.01 |
| 81H | C=5 | 2958.14 | L . S . Grey .Col .         | 5    | 0.05  | 0.03 |
| 81V | C=5 | 2958.14 | L . S . Grey .Col .         | 4.9  | 0.158 | 0.09 |
| 82H | C=5 | 2959.27 | L . S . Grey .Col .         | 1.4  | 0.12  | 0.07 |
| 83H | C=6 | 2982.23 | L . S . Grey .Col .         | 5.4  | 7.4   | 5.7  |
| 84H | C=6 | 2982.73 | L . S . Grey .Col .         | 11.7 | 4.3   | 3.2  |
| 85H | C=6 | 2983.72 | L . S . Grey .Col .         | 17.5 | 3.2   | 2.3  |
| 86V | C=6 | 2984.3  | L . S . Grey .Col .         | 22.4 | 9.1   | 7    |
| 87H | C=6 | 2984.66 | L . S . Grey .Col .         | 10.3 | 0.68  | 0.45 |

|      |     |         |                            |      |       |      |
|------|-----|---------|----------------------------|------|-------|------|
| 87V  | C=6 | 2984.66 | L . S . Grey .Col .        | 7.7  | 0.47  | 0.3  |
| 88H  | C=6 | 2985.33 | L . S . Grey .Col .        | 7.2  | 1.5   | 1    |
| 89H  | C=6 | 2985.75 | L . S . Grey .Col .        | 16.9 | 5.9   | 4.4  |
| 90H  | C=6 | 2985.11 | L . S . Grey .Col .        | 9.2  | 8     | 6.1  |
| 91H  | C=6 | 2986.88 | L . S . Grey .Col .        | 9.6  | 8.5   | 6.5  |
| 91V  | C=6 | 2986.88 | L . S . Grey .Col .        | 6.4  | 1.9   | 1.3  |
| 92H  | C=6 | 2987.23 | L . S . Grey .Col .        | 17.7 | 6.9   | 5.2  |
| 92V  | C=6 | 2987.23 | L . S . Grey .Col .        | 10.4 | 1.3   | 0.91 |
| 93H  | C=6 | 2987.82 | L . S . Grey .Col .        | 19.6 | 2.6   | 1.9  |
| 93V  | C=6 | 2987.82 | L . S . Grey .Col .        | 16.1 | 1.09  | 0.74 |
| 94H  | C=6 | 2989.31 | L . S . Grey .Col .        | 16.8 | 3.5   | 2.5  |
| 95H  | C=6 | 2989.8  | L . S . Grey .Col .        | 15.7 | 4.3   | 3.2  |
| 95V  | C=6 | 2989.8  | L . S . Grey .Col .        | 18.9 | 6.8   | 5.2  |
| 96H  | C=6 | 2980.18 | L . S . Grey .Col          | 7.7  | 8.1   | 6.2  |
| 96V  | C=6 | 2980.18 | L . S . Grey .Col          | 14.3 | 2     | 1.4  |
| 97H  | C=6 | 2990.85 | L . S . Grey .Col          | 12.3 | 0.25  | 0.16 |
| 97V  | C=6 | 2990.85 | L . S . Grey .Col          | 6.3  | 0.016 | 0.01 |
| 98H  | C=6 | 2991.13 | L . S . Grey .Col          | 10.5 | 0.69  | 0.45 |
| 98V  | C=6 | 2991.13 | L . S . Grey .Col          | 12.4 | 0.4   | 0.25 |
| 99H  | C=6 | 2991.84 | L . S . Grey .Col          | 9.1  | 0.018 | 0.01 |
| 99V  | C=6 | 2991.84 | L . S . Grey .Col          | 14.4 | 0.32  | 0.2  |
| 100H | C=6 | 2992.3  | L . S . Grey .Col          | 15.3 | 0.41  | 0.26 |
| 100V | C=6 | 2992.3  | L . S . Grey .Col          | 16.6 | 1.3   | 0.91 |
| 101H | C=6 | 2992.87 | L . S . Grey .Col          | 6.9  | 0.014 | 0.01 |
| 101V | C=6 | 2992.87 | L . S . Grey .Col          | 10.2 | 0.018 | 0.01 |
| 102H | C=6 | 2993.2  | L . S . Grey .Col . Breken | 12.9 | 0     | 0    |
| 102V | C=6 | 2993.2  | L . S . Grey .Col          | 13.3 | 0.14  | 0.01 |
| 103H | C=6 | 2993.74 | L . S . Grey .Col          | 9.9  | 0.24  | 0.15 |
| 103V | C=6 | 2993.74 | L . S . Grey .Col          | 9.3  | 0.25  | 0.16 |
| 104H | C=6 | 2994.32 | L . S . Grey .Col          | 18   | 7.2   | 5.5  |
| 104V | C=6 | 2994.32 | L . S . Grey .Col          | 19.6 | 9.4   | 7.3  |
| 105H | C=6 | 2994.73 | L . S . Grey .Col          | 16.4 | 0.014 | 0.01 |
| 106H | C=6 | 2995.21 | L . S . Grey .Col          | 13.2 | 10.6  | 8.3  |
| 106V | C=6 | 2995.21 | L . S . Grey .Col          | 13.9 | 2.9   | 2.1  |
| 107H | C=6 | 2995.82 | L . S . Grey .Col          | 2.7  | 0.199 | 0.12 |
| 108H | C=6 | 2996.77 | L . S . Grey .Col          | 8.9  | 1.3   | 0.91 |
| 109H | C=6 | 2997.16 | L . S . Grey .Col          | 3.4  | 0.56  | 0.36 |
| 110H | C=6 | 2997.7  | L . S . Grey .Col          | 6.2  | 0.02  | 0.01 |
| 110V | C=6 | 2997.7  | L . S . Grey .Col          | 6.8  | 0.43  | 0.28 |

|                         |     |         |                           |      |       |      |
|-------------------------|-----|---------|---------------------------|------|-------|------|
| 111V                    | C=6 | 2998.21 | L . S . Grey .Col         | 10.5 | 0.023 | 0.01 |
| 112H                    | C=6 | 2998.89 | L . S . Grey .Col         | 10   | 0.022 | 0.13 |
| 112V                    | C=6 | 2998.89 | L . S . Grey .Col         | 4    | 0.036 | 0.02 |
| 113V                    | C=6 | 2999.18 | L . S . Grey .Col         | 5.2  | 0.003 | 0    |
| 114H                    | C=6 | 2999.78 | L . S . Grey .Col         | 20.7 | 11.9  | 9.3  |
| 114V                    | C=6 | 2999.78 | L . S . Grey .Col         | 16.1 | 4.7   | 3.5  |
| <b>Yamama Formation</b> |     |         |                           |      |       |      |
| 115H                    | C=7 | 4404.25 | L . S . Grey .Col .Comp   | 5.2  | 0.001 | 0    |
| 115V                    | C=7 | 4404.25 | L . S . Grey .Col .Comp   | 1.3  | 0.001 | 0    |
| 116H                    | C=7 | 4404.63 | L . S . Grey .Col .Comp   | 5.9  | 0.002 | 0    |
| 116V                    | C=7 | 4404.63 | L . S . Grey .Col .Comp   | 2.7  | 0.001 | 0    |
| 117H                    | C=7 | 4405.3  | L . S . Grey .Col .Comp   | 2    | 0.009 | 0    |
| 117V                    | C=7 | 4405.3  | L . S . Grey .Col .Comp   | 1.9  | 0.005 | 0    |
| 118V                    | C=7 | 4406.24 | L . S . Grey .Col .Comp   | 5.2  | 0.006 | 0    |
| 119H                    | C=7 | 4406.73 | L . S . Grey .Col .       | 5.4  | 0.02  | 0.01 |
| 119V                    | C=7 | 4406.73 | L . S . Grey .Col .       | 11.8 | 7.2   | 5.5  |
| 120H                    | C=7 | 4408.03 | L . S . Grey .Col .       | 15.6 | 1.08  | 0.73 |
| 120V                    | C=7 | 4408.03 | L . S . Grey .Col .       | 16.3 | 0.72  | 0.48 |
| 121H                    | C=7 | 4408.58 | L . S . Grey .Col .Comp   | 7.3  | 0.008 | 0    |
| 121V                    | C=7 | 4408.58 | L . S . Grey .Col .Comp   | 4.7  | 0.038 | 0.02 |
| 122H                    | C=7 | 4409.16 | L . S . Grey .Col .Comp   | 5.4  | 0.029 | 0.02 |
| 122V                    | C=7 | 4409.16 | L . S . Grey .Col .Comp   | 6.7  | 0.09  | 0.05 |
| 123H                    | C=7 | 4409.89 | L . S . Darek Grey .Col . | 15   | 155   | 140  |
| 123V                    | C=7 | 4409.89 | L . S . Darek Grey .Col . | 15   | 87    | 75   |
| 124H                    | C=7 | 4410.23 | L . S . Darek Grey .Col . | 11.3 | 61    | 53   |
| 124V                    | C=7 | 4410.23 | L . S . Darek Grey .Col . | 10.7 | 2.4   | 1.7  |
| 125H                    | C=7 | 4410.58 | L . S . Darek Grey .Col . | 5.1  | 0.118 | 0.07 |
| 125V                    | C=7 | 4410.58 | L . S . Darek Grey .Col . | 5.1  | 0.114 | 0.07 |
| 126H                    | C=7 | 4411.33 | L . S . Darek Grey .Col . | 4    | 0.047 | 0.03 |
| 126V                    | C=7 | 4411.33 | L . S . Darek Grey .Col . | 7.1  | 0.03  | 0.02 |
| 127H                    | C=7 | 4411.75 | L . S . Darek Grey .Col . | 14.5 | 1.7   | 1.2  |
| 127V                    | C=7 | 4411.75 | L . S . Darek Grey .Col . | 11.9 | 0.45  | 0.29 |
| 128H                    | C=7 | 4412.07 | L . S . Darek Grey .Col . | 12.1 | 2.1   | 1.5  |
| 128V                    | C=7 | 4412.07 | L . S . Darek Grey .Col . | 12.5 | 0.72  | 0.48 |
| 129H                    | C=7 | 4412.61 | L . S . Darek Grey .Col . | 3.2  | 2.2   | 1.6  |
| 129V                    | C=7 | 4412.61 | L . S . Darek Grey .Col . | 2.5  | 0.13  | 0.08 |
| 130H                    | C=7 | 4413.11 | L . S . Grey .Col .       | 12.5 | 35    | 29   |
| 130V                    | C=7 | 4413.11 | L . S . Grey .Col .       | 11.1 | 25    | 21   |
| 131H                    | C=7 | 4413.88 | L . S . Grey .Col .       | 6.2  | 0.22  | 0.13 |

|      |     |         |                                  |      |       |      |
|------|-----|---------|----------------------------------|------|-------|------|
| 132H | C=7 | 4414.24 | L . S . Grey .Col .              | 3.4  | 9.7   | 7.5  |
| 132V | C=7 | 4414.24 | L . S . Grey .Col .              | 9.5  | 6.6   | 5    |
| 133H | C=7 | 4414.89 | L . S . Grey .Col .              | 12.9 | 25    | 21   |
| 133V | C=7 | 4414.89 | L . S . Grey .Col .              | 12.6 | 19    | 15   |
| 134H | C=7 | 4415.17 | L . S . Grey .Col .              | 9.6  | 2.6   | 1.9  |
| 134V | C=7 | 4415.17 | L . S . Grey .Col .              | 9.7  | 0.53  | 0.34 |
| 135H | C=7 | 4415.63 | L . S . Grey .Col .              | 7.1  | 2.1   | 1.5  |
| 135V | C=7 | 4415.63 | L . S . Grey .Col .              | 8.1  | 0.51  | 0.33 |
| 136H | C=7 | 4416.11 | L . S . Grey .Col .              | 8.5  | 12    | 10   |
| 136V | C=7 | 4416.11 | L . S . Grey .Col .              | 10.5 | 1.6   | 1.3  |
| 137H | C=7 | 4416.77 | L . S . Grey .Col .              | 10.4 | 0.69  | 0.45 |
| 137V | C=7 | 4416.77 | L . S . Grey .Col .              | 10.2 | 0.55  | 0.36 |
| 138H | C=7 | 4417.25 | L . S . Grey .Col .              | 5.2  | 0.27  | 0.17 |
| 138V | C=7 | 4417.25 | L . S . Grey .Col .              | 4.5  | 0.128 | 0.08 |
| 139H | C=7 | 4417.69 | L . S . Grey .Col .              | 3.9  | 0.134 | 0.06 |
| 139V | C=7 | 4417.69 | L . S . Grey .Col .              | 3.2  | 0.043 | 0.02 |
| 140H | C=7 | 4418.2  | L . S . Darek Grey .Col<br>.Comp | 2.7  | 0.152 | 0.09 |
| 140V | C=7 | 4418.2  | L . S . Darek Grey .Col<br>.Comp | 4    | 0.132 | 0.12 |
| 141H | C=7 | 4418.77 | L . S . Darek Grey .Col<br>.Comp | 0.7  | 0.002 | 0    |
| 141V | C=7 | 4418.77 | L . S . Darek Grey .Col<br>.Comp | 0.6  | 0.008 | 0    |
| 142H | C=7 | 4419.26 | L . S . Darek Grey .Col<br>.Comp | 7.6  | 0.01  | 0.1  |
| 143V | C=7 | 4419.8  | L . S . Darek Grey .Col<br>.Comp | 0.8  | 0.002 | 0    |
| 144H | C=8 | 4494.21 | L . S . Grey .Col .vug           | 19.7 | 5.4   | 4    |
| 144V | C=8 | 4494.21 | L . S . Grey .Col .vug           | 11.7 | 13    | 10   |
| 145H | C=8 | 4494.56 | L . S . Grey .Col .vug           | 10.4 | 57    | 49   |
| 145V | C=8 | 4494.56 | L . S . Grey .Col .vug           | 14.4 | 4.4   | 3.3  |
| 146H | C=8 | 4495.27 | L . S . Grey .Col .vug           | 16.3 | 20    | 15   |
| 146V | C=8 | 4495.27 | L . S . Grey .Col .vug           | 17.9 | 14    | 11   |
| 147H | C=8 | 4495.66 | L . S . Grey .Col .vug           | 13.9 | 1.6   | 1.1  |
| 147V | C=8 | 4495.66 | L . S . Grey .Col .vug           | 10.5 | 0.19  | 0.08 |
| 148H | C=8 | 4496.1  | L . S . Grey .Col .vug           | 1.7  | 0     | 0    |
| 148V | C=8 | 4496.1  | L . S . Grey .Col .vug           | 11.4 | 1.4   | 1    |
| 149H | C=8 | 4496.77 | L . S . Grey .Col .vug           | 12.9 | 45    | 35   |
| 149V | C=8 | 4496.77 | L . S . Grey .Col .vug           | 10.8 | 3     | 2.2  |
| 150H | C=8 | 4497.05 | L . S . Grey .Col .vug           | 17.6 | 27    | 22   |
| 150V | C=8 | 4497.05 | L . S . Grey .Col .vug           | 12.6 | 2.3   | 1.6  |
| 151H | C=8 | 4497.79 | L . S . Grey .Col .vug           | 15.8 | 1.08  | 0.72 |



|      |     |         |                                  |      |       |       |
|------|-----|---------|----------------------------------|------|-------|-------|
| 151V | C=8 | 4497.79 | L . S . Grey .Col .vug           | 13.8 | 0.24  | 0.15  |
| 152H | C=8 | 4498.24 | L . S . Darek Grey .Col .Vug     | 16.9 | 0.4   | 0.26  |
| 152V | C=8 | 4498.24 | L . S . Darek Grey .Col .Vug     | 17.3 | 2.8   | 2     |
| 153H | C=8 | 4498.61 | L . S . Darek Grey .Col .Vug     | 9.6  | 5.5   | 4.1   |
| 153V | C=8 | 4498.61 | L . S . Darek Grey .Col .Vug     | 4.2  | 0.32  | 0.2   |
| 154H | C=8 | 4499.25 | L . S . Darek Grey .Col .Vug     | 13.6 | 23    | 19    |
| 155H | C=8 | 4499.76 | L . S . Darek Grey .Col .Vug     | 6.3  | 2     | 1.4   |
| 156H | C=8 | 4500.3  | L . S . Darek Grey .Col .        | 4.3  | 2.5   | 1.8   |
| 156V | C=8 | 4500.3  | L . S . Darek Grey .Col .        | 7    | 0.11  | 0.07  |
| 157H | C=8 | 4500.7  | L . S . Darek Grey .Col .        | 2.9  | 0.3   | 0.19  |
| 158H | C=8 | 4501.14 | L . S . Darek Grey .Col .        | 18.5 | 78    | 69    |
| 158V | C=8 | 4501.14 | L . S . Darek Grey .Col .        | 19.1 | 67    | 58    |
| 159H | C=8 | 4501.09 | L . S . Darek Grey .Col .        | 11.5 | 3.9   | 2.9   |
| 159V | C=8 | 4501.09 | L . S . Darek Grey .Col .        | 8.4  | 5.2   | 3.9   |
| 160H | C=8 | 4502.32 | L . S . Darek Grey .Col .        | 13.4 | 1.6   | 1.1   |
| 160V | C=8 | 4502.32 | L . S . Darek Grey .Col .        | 11.8 | 0.007 | 0     |
| 161H | C=8 | 4502.78 | L . S . Darek Grey .Col .Vug     | 15.3 | 11    | 8.6   |
| 161V | C=8 | 4502.78 | L . S . Darek Grey .Col .Vug     | 15.4 | 0.64  | 0.42  |
| 162H | C=8 | 4503.81 | L . S . Darek Grey .Col .Vug     | 4.6  | 0.007 | 0     |
| 162V | C=8 | 4503.81 | L . S . Darek Grey .Col .Vug     | 5.6  | 0.007 | 0     |
| 163H | C=8 | 4504.04 | L . S . Darek Grey .Col          | 6.3  | 0.003 | 0     |
| 163V | C=8 | 4504.04 | L . S . Darek Grey .Col          | 7.6  | 0.009 | 0     |
| 164H | C=8 | 4505.62 | L . S . Darek Grey .Col          | 9.6  | 0.49  | 0.32  |
| 165H | C=8 | 4506.24 | L . S . Darek Grey .Col          | 13.6 | 1.3   | 0.91  |
| 166H | C=8 | 4506.73 | L . S . Darek Grey .Col          | 9.3  | 0.055 | 0.03  |
| 166V | C=8 | 4506.73 | L . S . Darek Grey .Col          | 13   | 0.79  | 0.053 |
| 167H | C=8 | 4507.22 | L . S . Darek Grey .Col          | 13.2 | 4.8   | 3.6   |
| 167V | C=8 | 4507.22 | L . S . Darek Grey .Col          | 2.7  | 0     | 0     |
| 168H | C=8 | 4507.71 | L . S . Darek Grey .Col          | 6    | 0.8   | 0.54  |
| 168V | C=8 | 4507.71 | L . S . Darek Grey .Col<br>.Comp | 4.7  | 0.05  | 0.03  |
| 169H | C=9 | 4512.34 | L . S . Darek Grey .Col<br>.Comp | 11.8 | 8.3   | 6.4   |
| 169V | C=9 | 4512.34 | L . S . Darek Grey .Col<br>.Comp | 13.8 | 0     | 0     |
| 170H | C=9 | 4512.82 | L . S . Darek Grey .Col<br>.Comp | 11.7 | 88    | 77    |
| 170V | C=9 | 4512.82 | L . S . Darek Grey .Col<br>.Comp | 10.9 | 21    | 17    |
| 171H | C=9 | 4513.23 | L . S . Grey .Col .              | 11.2 | 0.19  | 0.12  |
| 171V | C=9 | 4513.23 | L . S . Grey .Col .              | 11.4 | 0.039 | 0.02  |
| 172H | C=9 | 4513.8  | L . S . Grey .Col .              | 9.4  | 0.32  | 0.2   |

|      |     |         |                              |      |       |      |
|------|-----|---------|------------------------------|------|-------|------|
| 172V | C=9 | 4513.8  | L . S . Grey .Col .          | 9.7  | 0.32  | 0.2  |
| 173H | C=9 | 4514.21 | L . S . Grey .Col .          | 5.7  | 0.004 | 0    |
| 174H | C=9 | 4515.27 | L . S . Darek Grey .Col .Vug | 7.5  | 0.43  | 0.28 |
| 174V | C=9 | 4515.27 | L . S . Darek Grey .Col .Vug | 5.5  | 0.33  | 0.21 |
| 175H | C=9 | 4516.64 | L . S . Darek Grey .Col .Vug | 9    | 0.19  | 0.12 |
| 175V | C=9 | 4516.64 | L . S . Darek Grey .Col .Vug | 7.5  | 0.007 | 0    |
| 176V | C=9 | 4516.34 | L . S . Darek Grey .Col .Vug | 6.9  | 0.44  | 0.28 |
| 177H | C=9 | 4516.91 | L . S . Darek Grey .Col .Vug | 16.3 | 5     | 3.7  |
| 177V | C=9 | 4516.91 | L . S . Darek Grey .Col .Vug | 12.5 | 1     | 0.68 |
| 178H | C=9 | 4517.19 | L . S . Darek Grey .Col .Vug | 16.5 | 10.1  | 7.9  |
| 178V | C=9 | 4517.19 | L . S . Darek Grey .Col .Vug | 17.3 | 2     | 1.4  |
| 179H | C=9 | 4517.68 | L . S . Darek Grey .Col .    | 5.6  | 0.011 | 0.01 |
| 179V | C=9 | 4517.68 | L . S . Darek Grey .Col .    | 4    | 0.001 | 0    |
| 180H | C=9 | 4518.22 | L . S . Darek Grey .Col .    | 9.2  | 0.46  | 0.29 |
| 180V | C=9 | 4518.22 | L . S . Darek Grey .Col .    | 8.8  | 0.49  | 0.32 |
| 181H | C=9 | 4518.86 | L . S . Darek Grey .Col      | 5.8  | 0.21  | 0.13 |
| 181V | C=9 | 4518.86 | L . S . Darek Grey .Col      | 6.1  | 0.009 | 0    |
| 182H | C=9 | 4519.16 | L . S . Darek Grey .Col      | 6.8  | 0.005 | 0    |
| 182V | C=9 | 4519.16 | L . S . Darek Grey .Col      | 5.7  | 0.009 | 0    |
| 183H | C=9 | 4519.67 | L . S . Darek Grey .Col      | 14.1 | 57    | 49   |
| 183V | C=9 | 4519.67 | L . S . Darek Grey .Col      | 17.5 | 194   | 172  |
| 184H | C=9 | 4520.28 | L . S . Darek Grey .Col      | 11.7 | 3.7   | 2.7  |
| 184V | C=9 | 4520.28 | L . S . Darek Grey .Col      | 12.6 | 9.2   | 7.1  |
| 185H | C=9 | 4520.69 | L . S . Darek Grey .Col      | 16.1 | 86    | 75   |
| 185V | C=9 | 4520.69 | L . S . Darek Grey .Col      | 16.7 | 145   | 130  |
| 186V | C=9 | 4521.27 | L . S . Darek Grey .Col      | 13.6 | 13    | 10   |
| 187H | C=9 | 4521.75 | L . S . Darek Grey .Col      | 9.1  | 0     | 0    |
| 187V | C=9 | 4521.75 | L . S . Darek Grey .Col      | 6.8  | 0.03  | 0.02 |
| 188H | C=9 | 4522.14 | L . S . Darek Grey .Col      | 8.2  | 0.012 | 0.01 |
| 188V | C=9 | 4522.14 | L . S . Darek Grey .Col      | 8.2  | 0.011 | 0.01 |
| 189H | C=9 | 4522.77 | L . S . Darek Grey .Col      | 8.4  | 0.18  | 0.11 |
| 189V | C=9 | 4522.77 | L . S . Darek Grey .Col      | 6.8  | 0.009 | 0    |
| 190H | C=9 | 4523.15 | L . S . Darek Grey .Col      | 6    | 0.002 | 0    |
| 191H | C=9 | 4524.9  | Broken                       | 3.9  | 0     | 0    |
| 192H | C=9 | 4525.22 | L . S . Darek Grey .Col      | 13.6 | 2     | 1.4  |
| 192V | C=9 | 4525.22 | L . S . Darek Grey .Col      | 16.2 | 1.1   | 0.75 |
| 193H | C=9 | 4525.84 | L . S . Darek Grey .Col      | 6.1  | 0.009 | 0    |
| 193V | C=9 | 4525.84 | L . S . Darek Grey .Col      | 8.3  | 0.031 | 0.02 |
| 194H | C=9 | 4526.45 | L . S . Darek Grey .Col      | 11.3 | 2.1   | 1.5  |

|      |      |         |                                  |      |       |      |
|------|------|---------|----------------------------------|------|-------|------|
| 195H | C=10 | 4529.09 | L . S . Darek Grey .Col          | 13.2 | 0.27  | 0.17 |
| 195V | C=10 | 4529.09 | L . S . Darek Grey .Col          | 11.4 | 0.068 | 0.04 |
| 196H | C=10 | 4529.72 | L . S . Darek Grey .Col          | 13.7 | 0.1   | 0.06 |
| 196V | C=10 | 4529.72 | L . S . Darek Grey .Col          | 13.3 | 0.1   | 0.06 |
| 197H | C=10 | 4530.19 | L . S . Darek Grey .Col          | 9.6  | 0.31  | 0.19 |
| 198H | C=10 | 4530.54 | L . S . Darek Grey .Col          | 8.9  | 0.29  | 0.18 |
| 198V | C=10 | 4530.54 | L . S . Darek Grey .Col          | 10.6 | 4.1   | 3    |
| 199H | C=10 | 4531.18 | L . S . Darek Grey .Col          | 7    | 0.18  | 0.11 |
| 199V | C=10 | 4531.18 | L . S . Darek Grey .Col          | 8.3  | 0.25  | 0.16 |
| 200H | C=10 | 4531.79 | L . S . Darek Grey .Col          | 18.8 | 26    | 21   |
| 200V | C=10 | 4531.79 | L . S . Darek Grey .Col          | 19.4 | 13    | 10   |
| 201H | C=10 | 4531.1  | L . S . Darek Grey .Col          | 23.3 | 13    | 10   |
| 201V | C=10 | 4531.1  | L . S . Darek Grey .Col          | 21.6 | 19    | 15   |
| 202H | C=10 | 4532.77 | L . S . Darek Grey .Col          | 17.6 | 14    | 11   |
| 202V | C=10 | 4532.77 | L . S . Darek Grey .Col          | 19.6 | 7     | 5.3  |
| 203H | C=10 | 4533.22 | L . S . Darek Grey .Col          | 16.5 | 34    | 28   |
| 203V | C=10 | 4533.22 | L . S . Darek Grey .Col          | 16.9 | 44    | 37   |
| 204H | C=10 | 4533.83 | L . S . Darek Grey .Col          | 16.9 | 15    | 12   |
| 204V | C=10 | 4533.83 | L . S . Darek Grey .Col          | 16.3 | 46    | 39   |
| 205H | C=10 | 4534.13 | L . S . Darek Grey .Col          | 16.1 | 382   | 352  |
| 206H | C=10 | 4534.62 | L . S . Darek Grey .Col          | 24.2 | 264   | 244  |
| 206V | C=10 | 4534.62 | L . S . Darek Grey .Col          | 17.6 | 83    | 73   |
| 207H | C=10 | 4535.26 | L . S . Darek Grey .Col          | 18.5 | 38    | 32   |
| 207V | C=10 | 4535.26 | L . S . Darek Grey .Col          | 13.5 | 0.041 | 0.03 |
| 208H | C=10 | 4535.79 | L . S . Darek Grey .Col          | 5.9  | 0.002 | 0    |
| 208V | C=10 | 4535.79 | L . S . Darek Grey .Col          | 6.1  | 0.003 | 0    |
| 209H | C=10 | 4536.38 | L . S . Darek Grey .Col          | 15.4 | 14    | 11   |
| 209V | C=10 | 4536.38 | L . S . Darek Grey .Col          | 14.3 | 1.43  | 1    |
| 210H | C=10 | 4536.74 | L . S . Darek Grey .Col          | 14.3 | 5     | 3.7  |
| 210V | C=10 | 4536.74 | L . S . Darek Grey .Col          | 13.5 | 4     | 2.9  |
| 211H | C=10 | 4537.37 | L . S . Darek Grey .Col          | 11.3 | 0.052 | 0.03 |
| 211V | C=10 | 4537.37 | L . S . Darek Grey .Col          | 11.6 | 0.106 | 0.06 |
| 212H | C=10 | 4537.65 | L . S . Darek Grey .Col          | 7.6  | 0.043 | 0.02 |
| 212V | C=10 | 4537.65 | L . S . Darek Grey .Col          | 6.6  | 0.005 | 0    |
| 213H | C=10 | 4538.18 | L . S . Darek Grey .Col<br>.Comp | 1.6  | 0     | 0    |
| 214H | C=10 | 4538.82 | L . S . Darek Grey .Col          | 17.4 | 28    | 23   |
| 214V | C=10 | 4538.82 | L . S . Darek Grey .Col          | 16.7 | 31    | 26   |
| 215H | C=11 | 4547.24 | L . S . Darek Grey .Col          | 9.4  | 1.3   | 0.91 |
| 215V | C=11 | 4547.24 | L . S . Darek Grey .Col          | 10.1 | 3.1   | 2.2  |

|      |      |         |                              |      |       |       |
|------|------|---------|------------------------------|------|-------|-------|
| 216H | C=11 | 4547.83 | L . S . Darek Grey .Col .Far | 14   | 0     | 0     |
| 217H | C=11 | 4548.07 | L . S . Darek Grey .Col .Vug | 4.8  | 0.48  | 0.31  |
| 218H | C=11 | 4548.78 | L . S . Darek Grey .Col .Vug | 6.7  | 0.69  | 0.45  |
| 219H | C=11 | 4551.16 | L . S . Darek Grey .Col .Vug | 17.4 | 4.2   | 3.1   |
| 219V | C=11 | 4551.16 | L . S . Darek Grey .Col .Vug | 19.6 | 17    | 14    |
| 220H | C=11 | 4551.82 | L . S . Darek Grey .Col .    | 18.4 | 3     | 2.2   |
| 220V | C=11 | 4551.82 | L . S . Darek Grey .Col .    | 17.8 | 4.5   | 3.4   |
| 221H | C=11 | 4552.21 | L . S . Darek Grey .Col .    | 16   | 0.57  | 0.37  |
| 221V | C=11 | 4552.21 | L . S . Darek Grey .Col .    | 14.6 | 0.43  | 0.28  |
| 222V | C=11 | 4552.76 | L . S . Darek Grey .Col .Vug | 9.4  | 1.4   | 1     |
| 223H | C=11 | 4553.15 | L . S . Darek Grey .Col .    | 14.3 | 31    | 26    |
| 223V | C=11 | 4553.15 | L . S . Darek Grey .Col .    | 14.2 | 16    | 13    |
| 224H | C=11 | 4553.78 | L . S . Darek Grey .Col .    | 17.6 | 65    | 56    |
| 224V | C=11 | 4553.78 | L . S . Darek Grey .Col .    | 17.6 | 70    | 61    |
| 225H | C=11 | 4554.28 | L . S . Darek Grey .Col .    | 16.2 | 34    | 28    |
| 225V | C=11 | 4554.28 | L . S . Darek Grey .Col .    | 15.7 | 39    | 33    |
| 226H | C=11 | 4554.88 | L . S . Darek Grey .Col      | 11.6 | 0.32  | 0.2   |
| 226V | C=11 | 4554.88 | L . S . Darek Grey .Col      | 14.9 | 4     | 2.9   |
| 227H | C=11 | 4555.16 | L . S . Darek Grey .Col      | 16.1 | 17    | 14    |
| 227V | C=11 | 4555.16 | L . S . Darek Grey .Col      | 16.8 | 16    | 13    |
| 228H | C=11 | 4555.66 | L . S . Darek Grey .Col      | 11.3 | 12    | 10    |
| 228V | C=11 | 4555.66 | L . S . Darek Grey .Col      | 18   | 35    | 29    |
| 229H | C=11 | 4556.27 | L . S . Darek Grey .Col      | 7.9  | 0.19  | 0.12  |
| 229V | C=11 | 4556.27 | L . S . Darek Grey .Col      | 9.5  | 0.003 | 0     |
| 230H | C=11 | 4556.86 | L . S . Darek Grey .Col      | 11.6 | 0.12  | 0.07  |
| 230V | C=11 | 4556.86 | L . S . Darek Grey .Col      | 12.8 | 0.14  | 0.08  |
| 231H | C=11 | 4557.09 | L . S . Darek Grey .Col      | 15.5 | 0.89  | 0.06  |
| 231V | C=11 | 4557.09 | L . S . Darek Grey .Col      | 15.3 | 0.36  | 0.023 |
| 232H | C=11 | 4557.74 | L . S . Grey .Col .Comp      | 2.9  | 0.009 | 0     |
| 232V | C=11 | 4557.74 | L . S . Grey .Col .          | 9.3  | 0.39  | 0.25  |
| 233H | C=11 | 4558.32 | L . S . Grey .Col .          | 11.1 | 0.032 | 0.02  |
| 233V | C=11 | 4558.32 | L . S . Grey .Col .          | 12   | 0.13  | 0.08  |
| 234H | C=11 | 4558.87 | L . S . Grey .Col .          | 6.3  | 0.002 | 0     |
| 234V | C=11 | 4558.87 | L . S . Grey .Col .          | 9.3  | 0.25  | 0.16  |
| 235H | C=11 | 4559.21 | L . S . Grey .Col .          | 11.6 | 0.011 | 0.01  |
| 235V | C=11 | 4559.21 | L . S . Grey .Col .          | 11.8 | 0.031 | 0.02  |
| 236H | C=11 | 4559.92 | L . S . Grey .Col .          | 13.1 | 0.12  | 0.07  |
| 236V | C=11 | 4559.92 | L . S . Grey .Col .          | 15.1 | 0.23  | 0.14  |
| 237H | C=11 | 4560.42 | L . S . Grey .Col .          | 12.8 | 0.013 | 0.01  |

|      |      |         |                                  |      |       |      |
|------|------|---------|----------------------------------|------|-------|------|
| 237V | C=11 | 4560.42 | L . S . Grey .Col .              | 12.7 | 1.2   | 0.83 |
| 238V | C=12 | 4561.27 | L . S . Grey .Col .              | 7.9  | 0.11  | 0.03 |
| 239H | C=12 | 4562.23 | L . S . Grey .Col .              | 11.6 | 0.15  | 0.09 |
| 239V | C=12 | 4562.23 | L . S . Grey .Col .              | 13.5 | 0.38  | 0.24 |
| 240H | C=12 | 4563.8  | L . S . Grey .Col .              | 10.1 | 0.22  | 0.13 |
| 240V | C=12 | 4563.8  | L . S . Grey .Col .              | 12.6 | 0.24  | 0.15 |
| 241H | C=12 | 4564.19 | L . S . Grey .Col .              | 11.4 | 0     | 0    |
| 242H | C=12 | 4564.68 | L . S . Grey .Col .              | 5.12 | 0.15  | 0.09 |
| 243H | C=12 | 4565.79 | L . S . Darek Grey .Col .Far     | 12.5 | 0     | 0    |
| 243V | C=12 | 4565.79 | L . S . Darek Grey .Col .        | 14.8 | 1.2   | 0.83 |
| 244H | C=12 | 4566.1  | L . S . Darek Grey .Col .        | 9.9  | 0.047 | 0.03 |
| 244V | C=12 | 4566.1  | L . S . Darek Grey .Col .        | 12.9 | 0.53  | 0.34 |
| 245H | C=12 | 4566.81 | L . S . Darek Grey .Col .        | 15.6 | 2.3   | 1.6  |
| 246H | C=12 | 4567.24 | L . S . Darek Grey .Col .        | 11.1 | 3.2   | 2.3  |
| 246V | C=12 | 4567.24 | L . S . Darek Grey .Col .        | 10.6 | 3.6   | 2.6  |
| 247H | C=12 | 4567.66 | L . S . Darek Grey .Col .Far     | 5.7  | 0     | 0    |
| 247V | C=12 | 4567.66 | L . S . Darek Grey .Col .        | 6.9  | 0.004 | 0    |
| 248H | C=12 | 4568.15 | L . S . Darek Grey .Col .        | 7.9  | 1.2   | 0.83 |
| 248V | C=12 | 4568.15 | L . S . Darek Grey .Col .        | 8.3  | 0.33  | 0.21 |
| 249H | C=13 | 4572.28 | L . S . Darek Grey .Col .        | 0.7  | 0.001 | 0    |
| 249V | C=13 | 4572.28 | L . S . Darek Grey .Col .        | 0.71 | 0.001 | 0    |
| 250H | C=13 | 4573.57 | L . S . Darek Grey .Col .        | 8    | 0.44  | 0.28 |
| 251H | C=13 | 4574.11 | L . S . Darek Grey .Col<br>.Comp | 2.5  | 0.005 | 0    |
| 252H | C=13 | 4574.76 | L . S . Grey .Col .              | 0.9  | 0.004 | 0    |
| 252V | C=13 | 4574.76 | L . S . Grey .Col .              | 1.4  | 0.003 | 0    |
| 253H | C=13 | 4575.8  | L . S . Grey .Col .              | 0.7  | 0.006 | 0    |
| 253V | C=13 | 4575.8  | L . S . Grey .Col .              | 0.9  | 0.002 | 0    |
| 254H | C=13 | 4575.75 | L . S . Grey .Col .              | 6.1  | 1.2   | 0.8  |
| 255H | C=13 | 4576.33 | L . S . Grey .Col .              | 6.1  | 0.66  | 0.44 |
| 255V | C=13 | 4576.33 | L . S . Grey .Col .              | 9.3  | 1.5   | 1    |
| 256H | C=13 | 4577.83 | L . S . Grey .Col .Fra           | 8    | 0     | 0    |
| 257H | C=13 | 4578.68 | L . S . Grey .Col .              | 10   | 0.4   | 0.26 |
| 258V | C=13 | 4578.68 | L . S . Grey .Col .              | 13.5 | 0.82  | 0.55 |
| 259H | C=13 | 4581.23 | L . S . Grey .Col . Vug          | 10.7 | 3.8   | 2.8  |
| 259V | C=13 | 4581.23 | L . S . Grey .Col . Vug          | 11.4 | 2.5   | 1.8  |
| 260H | C=13 | 4581.72 | L . S . Grey .Col . Vug          | 11.2 | 13    | 10   |
| 260V | C=13 | 4581.72 | L . S . Grey .Col . Vug          | 11.2 | 1.05  | 0.71 |
| 261H | C=13 | 4582.14 | L . S . Grey .Col . Vug          | 18.3 | 3.8   | 2.8  |
| 261V | C=13 | 4582.14 | L . S . Grey .Col . Vug          | 19.1 | 8.7   | 6.7  |

|      |      |         |                         |      |       |      |
|------|------|---------|-------------------------|------|-------|------|
| 262H | C=13 | 4583.27 | L . S . Grey .Col .Comp | 5.3  | 0.003 | 0    |
| 262V | C=13 | 4583.27 | L . S . Grey .Col .Comp | 1.1  | 0     | 0    |
| 263H | C=13 | 4584.15 | L . S . Grey .Col .Comp | 1.15 | 0.81  | 0.54 |
| 263V | C=13 | 4584.15 | L . S . Grey .Col .Comp | 1.4  | 0.002 | 0    |
| 264H | C=13 | 4584.58 | L . S . Grey .Col .Comp | 0.7  | 0.002 | 0    |
| 265H | C=13 | 4585.11 | L . S . Grey .Col .Comp | 0.5  | 0.002 | 0    |
| 266H | C=13 | 4585.6  | L . S . Grey .Col .Comp | 9.8  | 0.003 | 0    |
| 266V | C=13 | 4585.6  | L . S . Grey .Col .Comp | 9.3  | 0.003 | 0    |
| 267H | C=13 | 4585.12 | L . S . Grey .Col .Comp | 9.7  | 0.004 | 0    |
| 268H | C=14 | 4590.26 | L . S . Grey .Col .Fra  | 12.6 | 0.53  | 0.34 |
| 268V | C=14 | 4590.26 | L . S . Grey .Col .     | 11.4 | 0.23  | 0.14 |
| 269H | C=14 | 4590.9  | L . S . Grey .Col .     | 7.6  | 0.007 | 0    |
| 269V | C=14 | 4590.9  | L . S . Grey .Col .     | 10.1 | 0.15  | 0.09 |
| 270H | C=14 | 4591.16 | L . S . Grey .Col .     | 12.3 | 0.25  | 0.16 |
| 270V | C=14 | 4591.16 | L . S . Grey .Col .     | 12.1 | 0.25  | 0.16 |
| 271H | C=14 | 4592.33 | L . S . Grey .Col .     | 15.2 | 1.8   | 1.3  |
| 271V | C=14 | 4592.33 | L . S . Grey .Col .     | 16.2 | 3.1   | 2.2  |
| 272H | C=14 | 4593.66 | L . S . Grey .Col .     | 14.1 | 6.5   | 4.9  |
| 272V | C=14 | 4593.66 | L . S . Grey .Col .     | 14.7 | 2.3   | 1.6  |
| 273H | C=14 | 4593.13 | L . S . Grey .Col .     | 17.3 | 3.4   | 2.5  |
| 273V | C=14 | 4593.13 | L . S . Grey .Col .     | 9    | 0.47  | 0.3  |
| 274H | C=14 | 4593.87 | L . S . Grey .Col .     | 16.5 | 10.1  | 7.9  |
| 274V | C=14 | 4593.87 | L . S . Grey .Col .     | 12.1 | 0.38  | 0.24 |
| 275H | C=14 | 4594.28 | L . S . Grey .Col .     | 7.8  | 0.17  | 0.1  |
| 275V | C=14 | 4594.28 | L . S . Grey .Col .     | 10.1 | 0.14  | 0.08 |
| 276H | C=14 | 4594.64 | L . S . Grey .Col .     | 14.8 | 0.6   | 0.39 |
| 276V | C=14 | 4594.64 | L . S . Grey .Col .     | 14.8 | 0.17  | 0.1  |
| 277H | C=14 | 4594.64 | L . S . Grey .Col .     | 15.7 | 12.1  | 10   |
| 277V | C=14 | 4594.64 | L . S . Grey .Col .     | 17.6 | 3.2   | 2.3  |
| 278H | C=14 | 4595.71 | L . S . Grey .Col .     | 15.8 | 1.6   | 1.1  |
| 278V | C=14 | 4595.71 | L . S . Grey .Col .     | 17.1 | 1.8   | 1.3  |
| 279H | C=14 | 4596.11 | L . S . Grey .Col .     | 16.7 | 1.9   | 1.3  |
| 279V | C=14 | 4596.11 | L . S . Grey .Col .     | 15.7 | 1.9   | 1.3  |
| 280H | C=14 | 4596.71 | L . S . Grey .Col .     | 15.4 | 0.81  | 0.54 |
| 281H | C=14 | 4597.27 | L . S . Grey .Col .     | 15.6 | 0.64  | 0.42 |
| 281V | C=14 | 4597.27 | L . S . Grey .Col .     | 16.7 | 0.81  | 0.54 |
| 282H | C=14 | 4597.85 | L . S . Grey .Col .     | 13.1 | 0.27  | 0.17 |
| 282V | C=14 | 4597.85 | L . S . Grey .Col .     | 11.4 | 0.067 | 0.04 |
| 283H | C=14 | 4598.23 | L . S . Grey .Col .Fra  | 9.8  | 0     | 0    |

|      |      |         |                     |      |       |      |
|------|------|---------|---------------------|------|-------|------|
| 284H | C=14 | 4598.69 | L . S . Grey .Col . | 10.9 | 0.37  | 0.23 |
| 284V | C=14 | 4598.69 | L . S . Grey .Col . | 11.3 | 0.21  | 0.13 |
| 285H | C=14 | 4599.1  | L . S . Grey .Col . | 10.5 | 1.1   | 0.75 |
| 285V | C=14 | 4599.1  | L . S . Grey .Col . | 11.2 | 0.32  | 0.2  |
| 286H | C=14 | 4599.7  | L . S . Grey .Col . | 9.6  | 0.04  | 0.02 |
| 286V | C=14 | 4599.7  | L . S . Grey .Col . | 7.7  | 0.031 | 0.02 |
